# Supplementary material
Source: publisher figshare collection journal article supplement (https://acs.figshare.com/ndownloader/files/25189409)
Supplement: Supplementary file 1 [file 25189409]

# Highly Emissive Perylene Diimide-Based Metallacages and Their Host-Guest Chemistry for Information Encryption

Yali Hou,<sup>†</sup> Zeyuan Zhang,<sup>†</sup> Shuai Lu,<sup>‡,||</sup> Jun Yuan,<sup>§</sup> Qiangyu Zhu,<sup>#</sup> Wei-Peng Chen,<sup>§</sup> Sanliang Ling,<sup>⊥</sup> Xiaopeng Li,<sup>‡</sup> Yan-Zhen Zheng,<sup>§</sup> Kelong Zhu,<sup>§</sup> Mingming Zhang,<sup>\*,†</sup>

<sup>†</sup>State Key Laboratory for Mechanical Behavior of Materials, Shaanxi International Research Center for Soft Matter, School of Materials Science and Engineering, Xi'an Jiaotong University, Xi'an 710049, P. R. China

<sup>‡</sup> College of Chemistry and Environmental Engineering, Shenzhen University, Shenzhen 518055, P. R. China

<sup>||</sup> College of Chemistry and Molecular Engineering, Zhengzhou University, Zhengzhou 450001, P. R. China

<sup>§</sup> School of Chemistry, Sun Yat-Sen University, Guangzhou 510275, P. R. China

<sup>#</sup>School of Chemistry and Chemical Engineering, Shanghai Jiao Tong University, Shanghai 200240, P. R. China

<sup>§</sup>Frontier Institute of Science and Technology (FIST), Xi'an Jiaotong University, Xi'an 710049, P. R. China

<sup>⊥</sup>Advanced Materials Research Group, Faculty of Engineering, University of Nottingham, Nottingham, NG7 2RD, United Kingdom

## Supporting Information

|                                                                                                                 |     |
|-----------------------------------------------------------------------------------------------------------------|-----|
| 1. <i>Materials and methods</i>                                                                                 | S2  |
| 2. <i>Synthetic procedures and characterization data</i>                                                        | S2  |
| 2.1 <i>Synthesis of compound 8</i>                                                                              | S2  |
| 2.2 <i>Synthesis of compound 6</i>                                                                              | S3  |
| 2.3 <i>Synthesis of ligand 1</i>                                                                                | S4  |
| 2.4 <i>Self-assembly of metallacycle 4a</i>                                                                     | S7  |
| 2.5 <i>Self-assembly of metallacage 4b</i>                                                                      | S9  |
| 2.6 <i>Self-assembly of metallacage 4c</i>                                                                      | S10 |
| 3. <i>X-ray structure determination</i>                                                                         | S13 |
| 4. <i>Measurements of absolute fluorescence quantum yields</i>                                                  | S14 |
| 5. <i>Fluorescence decay traces and lifetime</i>                                                                | S18 |
| 6. <i>Host-guest complexation study</i>                                                                         | S22 |
| 6.1 <i>Determination of stoichiometry by UV-vis absorption spectra</i>                                          | S22 |
| 6.2 <i>ESI-TOF-MS spectra of complexes</i>                                                                      | S24 |
| 6.3 <i>Determination of binding constant (<math>K_a</math>) by <math>^1\text{H}</math> NMR titration method</i> | S26 |
| 7. <i>The fluorescence spectra and corresponding CIE coordinates of complex 4c-<math>\text{G}_3</math></i>      | S29 |
| <i>References</i>                                                                                               | S30 |

## 1. Materials and methods

All reagents and deuterated solvents were used as purchased without further purification. Compounds **8**,<sup>S1</sup> **3**<sup>S2</sup> and **6**<sup>S1</sup> were prepared according to the literature procedures. NMR spectra were recorded on a Bruker Avance 400 or 600 MHz spectrometer. <sup>1</sup>H NMR chemical shifts were recorded relative to residual solvent signals. <sup>31</sup>P{<sup>1</sup>H} NMR chemical shifts were referenced to an external unlocked sample of 85% H<sub>3</sub>PO<sub>4</sub> ( $\delta$  0.0). Mass spectra were recorded on a Micromass Quattro II triple-quadrupole mass spectrometer using electrospray ionization with a MassLynx operating system. The UV-vis experiments were conducted on a Lambda 950 absorption spectrophotometer. The fluorescent experiments were conducted on an Edinburgh FLS9 or a Hitachi F-7000 fluorescence spectrophotometer. X-ray diffraction analysis was conducted on a Bruker SMART APEX II diffractometer at 108 K with graphite-monochromated Mo K $\alpha$  radiation ( $\lambda$  = 0.71073 Å) or a Bruker D8 VENTURE PHOTON III MetalJet, in which crystals were frozen in paratone oil inside a cryoloop under a cold stream of N<sub>2</sub>. An empirical absorption correction using SADABS was applied for all data. The structures were solved and refined to convergence on F2 for all independent reflections by the full-matrix least squares method using the OLEX2 1.2. <sup>1</sup>H NMR titration experiments were performed by the addition of different amount of metallacages into the CD<sub>3</sub>CN solution of polyaromatic guests and the concentration of the guests was fixed to be 0.5 mM. The data was fitted according to the following equation:

$$\delta = (\Delta\delta_{max}/[G]_0) (0.5[H] + 0.5 ([G]_0 + 1/K_a) - (0.5([H]^2 + (2[H](1/K_a - [G]_0)) + (1/K_a + [G]_0)^2)^{0.5}))$$

Where  $\delta$  is the <sup>1</sup>H NMR chemical shifts of guest molecules upon the addition of metallacages,  $\Delta\delta_{max}$  is the maximum chemical shift change when the guests are totally complexed,  $[G]_0$  is the fixed concentration of guests (0.5 mM),  $[H]$  is the concentration of the metallacages.<sup>S3</sup>

## 2. Synthetic procedures and characterization data

### 2.1 Synthesis of compound **8**

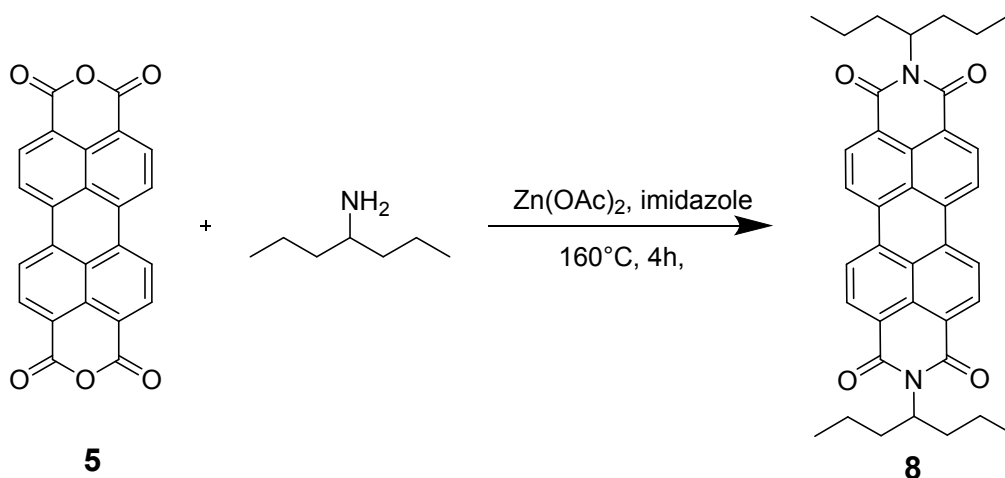

Compound **5** (1.00 g, 2.54 mmol), Zn(OAc)<sub>2</sub> (0.77 g, 4.08 mmol) and imidazole (8.37 g, 102 mmol) were added in 4-heptylamine (0.96 g, 8.40 mmol) under a N<sub>2</sub> atmosphere and the whole system was stirred at 165 °C for 4 h. After being cooled to room temperature, the reaction mixture was filtrated and

the residue was washed with methanol. The crude product was purified by flash column chromatography ( $\text{CH}_2\text{Cl}_2$ ) to give compound **8** (1.30 g, 86%) as a red solid.  $^1\text{H}$  NMR (400 MHz,  $\text{CDCl}_3$ , 295 K)  $\delta$  8.61–8.66 (m, 8H), 5.20–5.27 (m, 2H), 2.18–2.33 (m, 4H), 1.79–1.87 (m, 4H), 1.24–1.43 (m, 8H), 0.93 (t,  $J = 7.3$  Hz, 12H). The  $^1\text{H}$  NMR spectrum of **8** matches well with reported results.<sup>S1</sup>

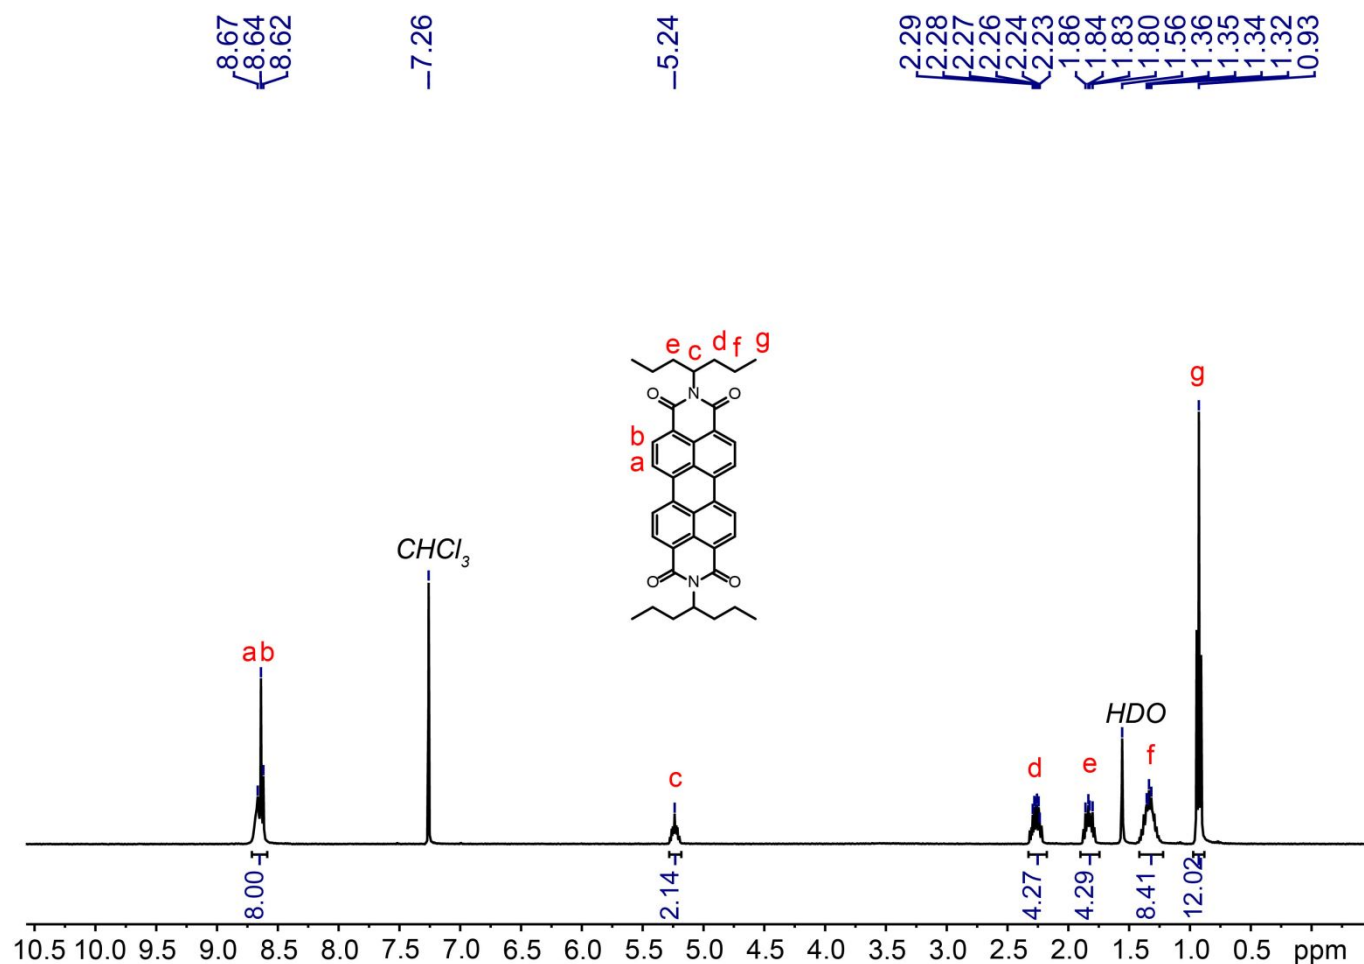

**Figure S1.**  $^1\text{H}$  NMR spectrum ( $\text{CDCl}_3$ , 400 MHz, 295 K) recorded for **8**.

## 2.2 Synthesis of compound **6**

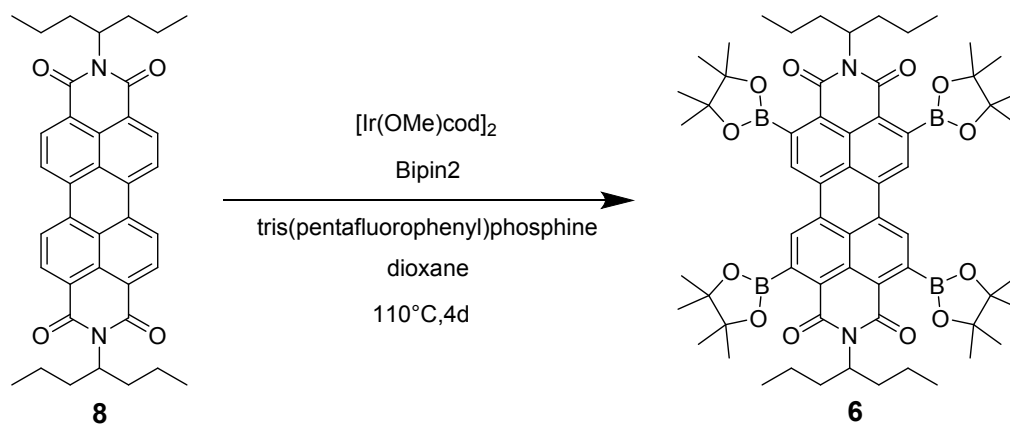

A mixture of compound **8** (266 mg, 0.45 mmol),  $[\text{Ir}(\text{OMe})\text{cod}]_2$  (29.8 mg, 45.0  $\mu\text{mol}$ ), tris(pentafluorophenyl)phosphine (0.10 mg, 0.19  $\mu\text{mol}$ ), and bis(pinacolato)diboron (1.03 g, 4.04 mmol)

in 10 mL of dioxane was stirred under nitrogen at 120 °C for 4 days. After being cooled to room temperature, the solvent was removed under reduced pressure. The residue was purified by flash column chromatography (dichloromethane : ethyl acetate = 1:1) to give compound **6** (0.30 g, 61%) as a red solid.  $^1\text{H}$  NMR (400 MHz,  $\text{CDCl}_3$ , 295 K)  $\delta$  8.52 (s, 4H), 5.04–5.13 (m, 2H), 2.15–2.24 (m, 4H), 1.75–1.84 (m, 4H), 1.54 (s, 48H), 1.31–1.39 (m, 8H), 0.91 (t,  $J=7.3$  Hz, 12H). The  $^1\text{H}$  NMR spectrum of **6** matches well with reported results.<sup>S1</sup>

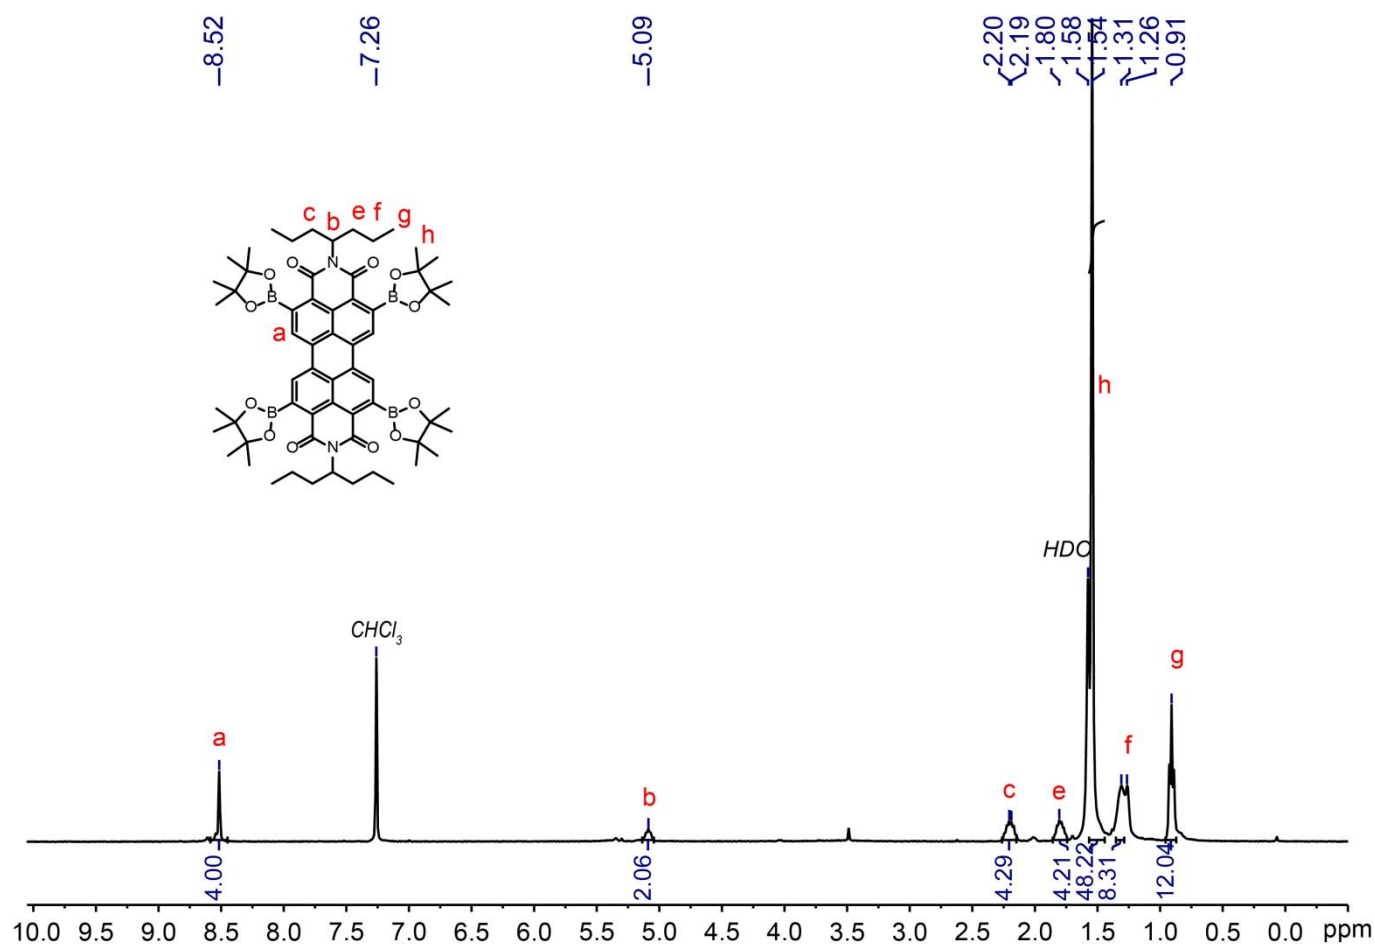

**Figure S2.**  $^1\text{H}$  NMR spectrum (400 MHz,  $\text{CDCl}_3$ , 295 K) recorded for **6**.

### 2.3 Synthesis of ligand **1**

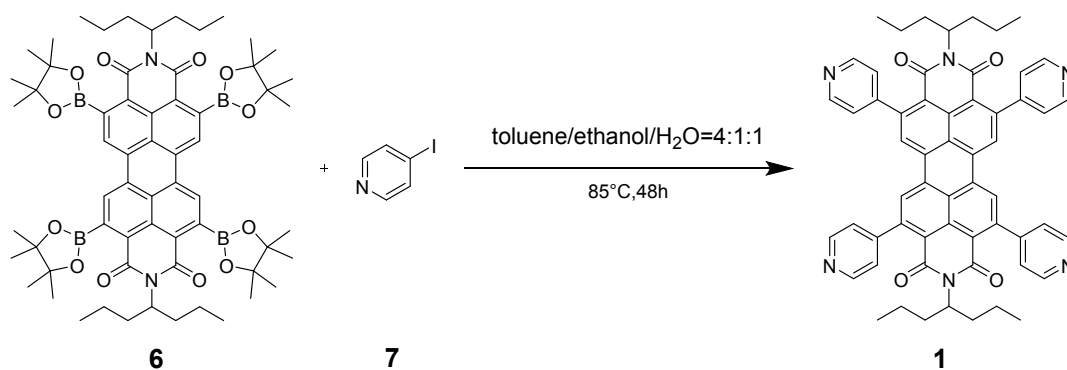

To compound **6** (0.30 g, 0.28 mmol), 4-pyridylboronic acid (0.68 g, 3.36 mmol), anhydrous  $\text{Cs}_2\text{CO}_3$  (1.90 g, 13.8 mmol) and  $\text{Pd}(\text{PPh}_3)_4$  (63.6 mg, 0.05 mmol) in toluene (28.0 mL),  $\text{H}_2\text{O}$  (7.0 mL) and ethanol (7.0 mL) were added. Then the reaction mixture was stirred at 85 °C for 48 h under nitrogen atmosphere. After being cooled to room temperature, the product was concentrated to give a crude product which was purified by flash column chromatography with  $\text{CH}_2\text{Cl}_2:\text{CH}_3\text{OH}$  (50:1, v/v) as the eluent to afford compound **1** (0.15 g, 60%) as an orange powder. M.P. 451.39~451.97 °C.  $^1\text{H}$  NMR (400 MHz,  $\text{CDCl}_3$ , 295 K)  $\delta$  8.77 (d,  $J = 4.8$  Hz, 8H), 8.31 (s, 4H), 7.35 (d,  $J = 4.8$  Hz, 8H), 4.88–4.95 (m, 2H), 1.95–2.04 (m, 4H), 1.59–1.67 (m, 4H), 1.22–1.27 (m, 8H), 0.88 (t,  $J = 7.3$  Hz, 12H).  $^{13}\text{C}$  NMR (151 MHz,  $\text{CDCl}_3$ , 295 K) 162.90, 150.16, 149.78, 145.29, 132.70, 130.87, 126.78, 126.02, 122.71, 121.54, 54.56, 34.00, 20.03, 13.97. ESI-HR-MS:  $m/z$  895.3967 [**1** +  $\text{H}$ ] $^+$ , calcd. for  $[\text{C}_{58}\text{H}_{50}\text{N}_6\text{O}_4]^+$ , 895.3894.

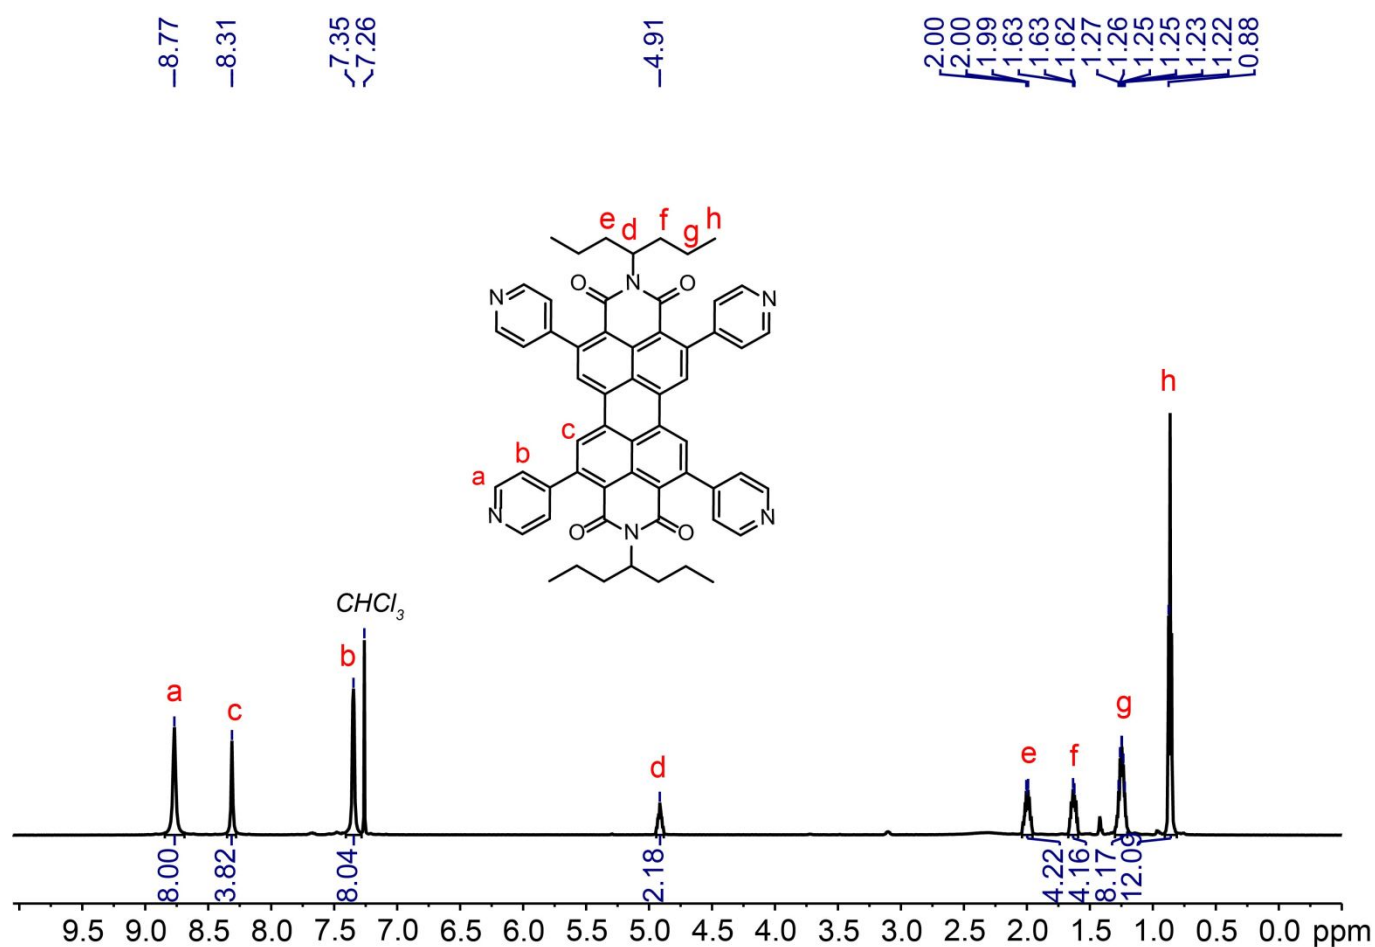

**Figure S3.**  $^1\text{H}$  NMR spectrum (400 MHz,  $\text{CDCl}_3$ , 295 K) recorded for **1**.

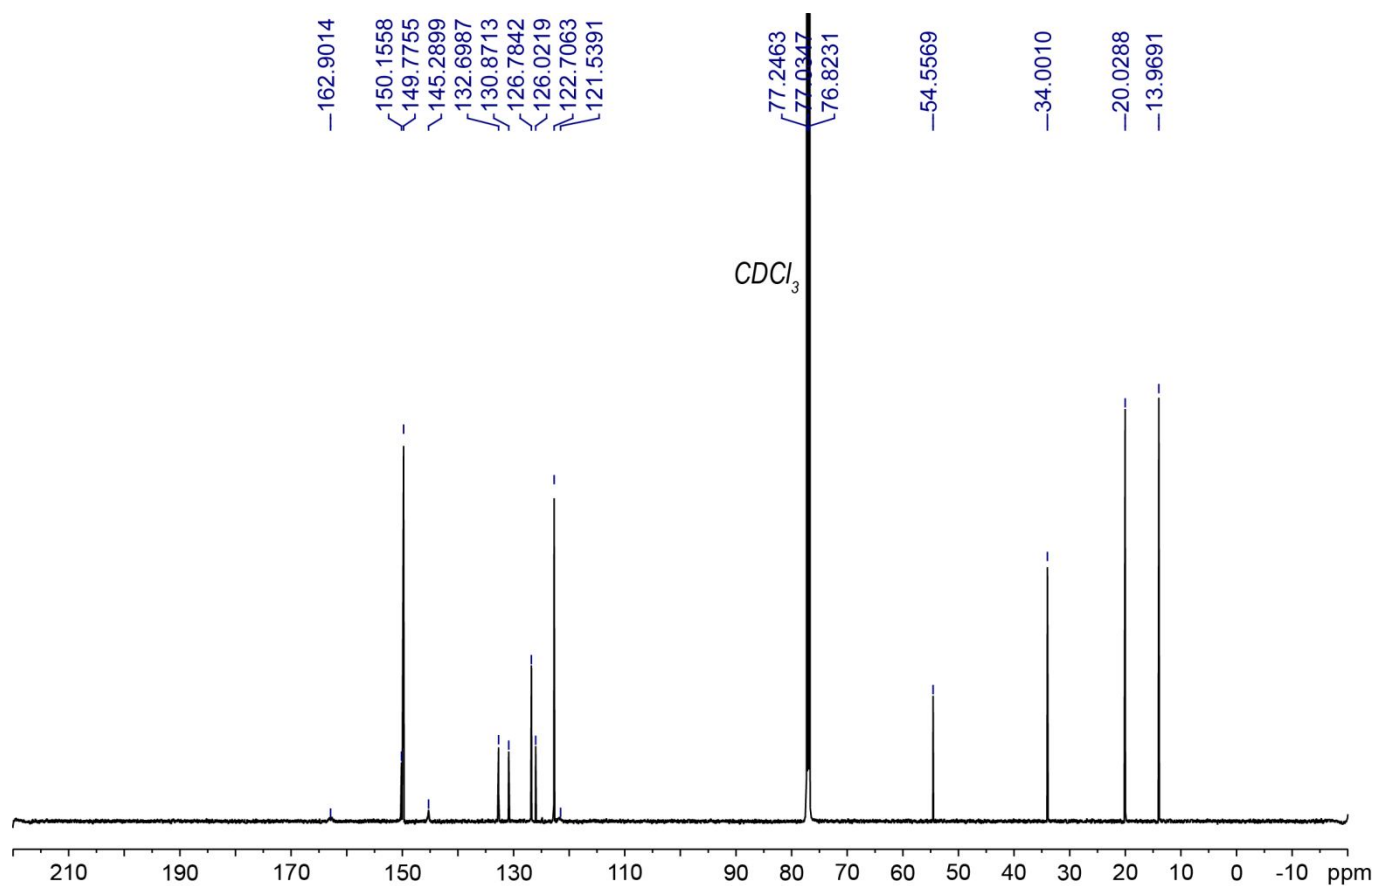

**Figure S4.**  $^{13}\text{C}$  NMR spectrum (151 MHz,  $\text{CDCl}_3$ , 295 K) recorded for **1**.

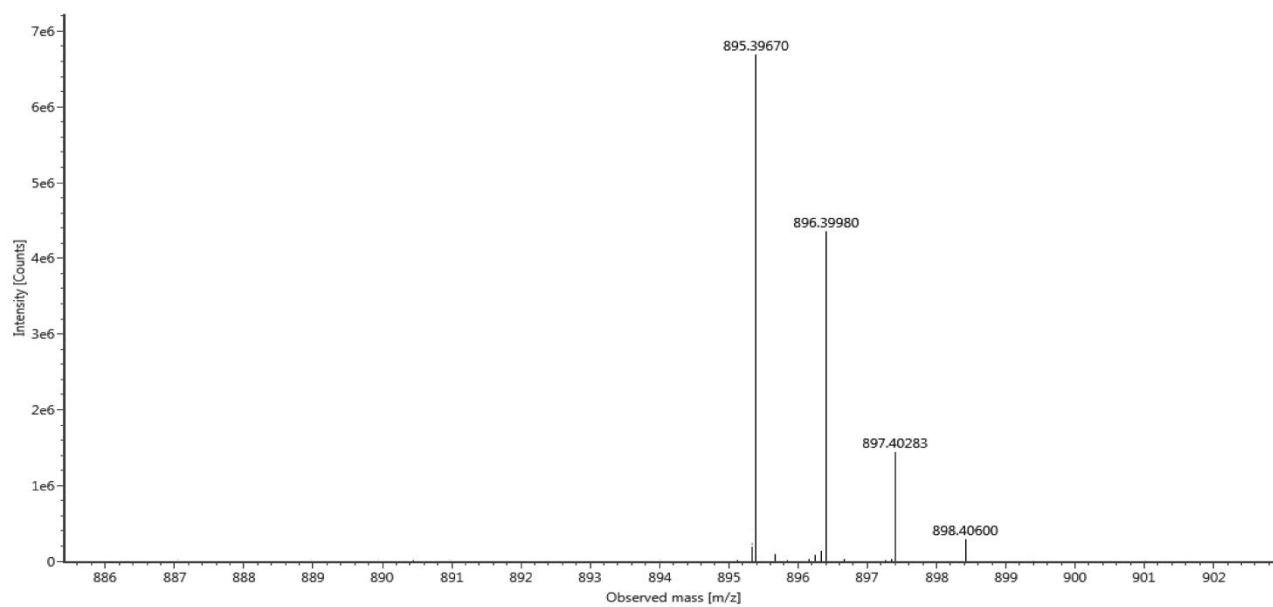

**Figure S5.** ESI-HR-MS spectrum of **1**.

## 2.4 Self-assembly of metallacycle **4a**

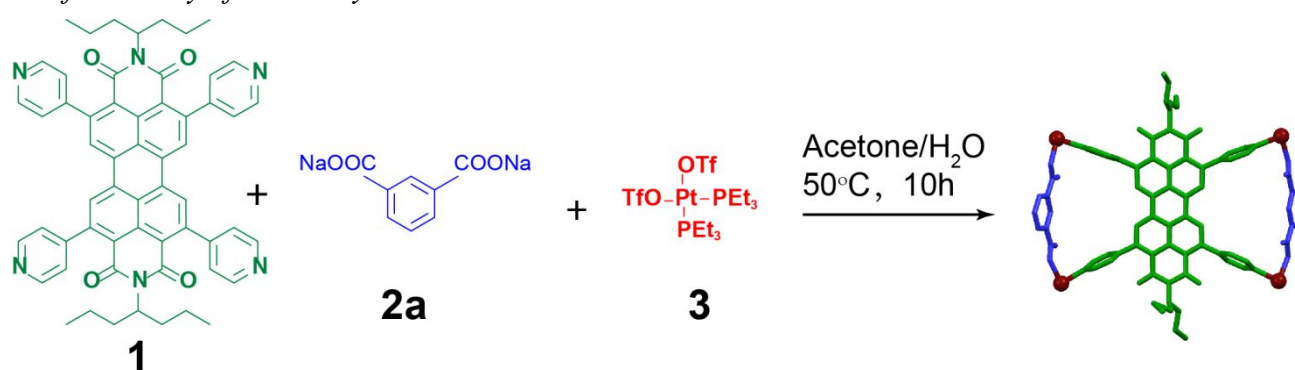

**Figure S6.** Self-assembly of metallacycle **4a**.

**1** (3.12 mg, 3.48  $\mu\text{mol}$ ), sodium isophthalate **2a** (1.46 mg, 6.96  $\mu\text{mol}$ ), and *cis*-( $\text{PEt}_3$ )<sub>2</sub>Pt(OTf)<sub>2</sub> (10.17 mg, 13.92  $\mu\text{mol}$ ) were mixed in a 1:2:4 molar ratio and dissolved in acetone/water (5.0 mL, 4:1, v/v). The whole reaction mixture was heated at 50 °C for 10 h and then cooled to room temperature. The solvent was removed by nitrogen flow. The residue was redissolved in  $\text{CH}_3\text{CN}$  (1.0 mL) and filtered, and then the filtrate was poured into ethyl ether (10.0 mL) to give a precipitate, which was collected by centrifugation to give **4a** (11.47 mg, 93%) as an orange powder.  $^1\text{H}$  NMR (400 MHz,  $\text{CD}_3\text{CN}$ , 295 K)  $\delta$  8.86 (d,  $J$  = 4.5 Hz, 8H), 8.44 (s, 4H), 8.21 (s, 2H), 7.94 (dd,  $J$  = 7.7, 1.6 Hz, 4H), 7.53 (d,  $J$  = 4.5 Hz, 8H), 7.32 (t,  $J$  = 7.7 Hz, 2H), 4.77–4.81 (m, 2H), 0.81 (t,  $J$  = 7.3 Hz, 12H).  $^{31}\text{P}\{^1\text{H}\}$  NMR (121.4 MHz,  $\text{CD}_3\text{CN}$ , 295 K): 5.42 ppm (d,  $^2J_{\text{P-P}}$  = 15.8 Hz,  $^{195}\text{Pt}$  satellites,  $^1J_{\text{Pt-P}}$  = 2600 Hz), –0.56 ppm (d,  $^2J_{\text{P-P}}$  = 15.8 Hz,  $^{195}\text{Pt}$  satellites,  $^1J_{\text{Pt-P}}$  = 2600 Hz); ESI-TOF-MS:  $m/z$  736.9174 [**4a** – 4OTf] $^{4+}$ , 1032.2203 [**4a** – 3OTf] $^{3+}$ .

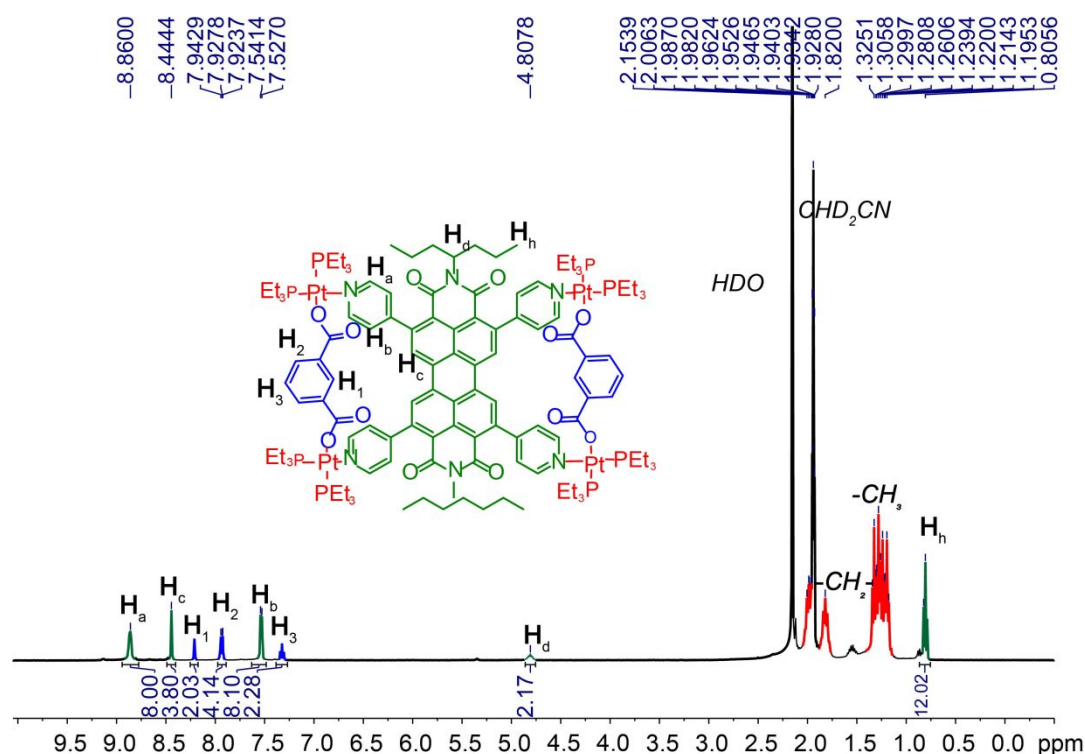

**Figure S7.**  $^1\text{H}$  NMR spectrum (400 MHz,  $\text{CD}_3\text{CN}$ , 295 K) recorded for **4a**.

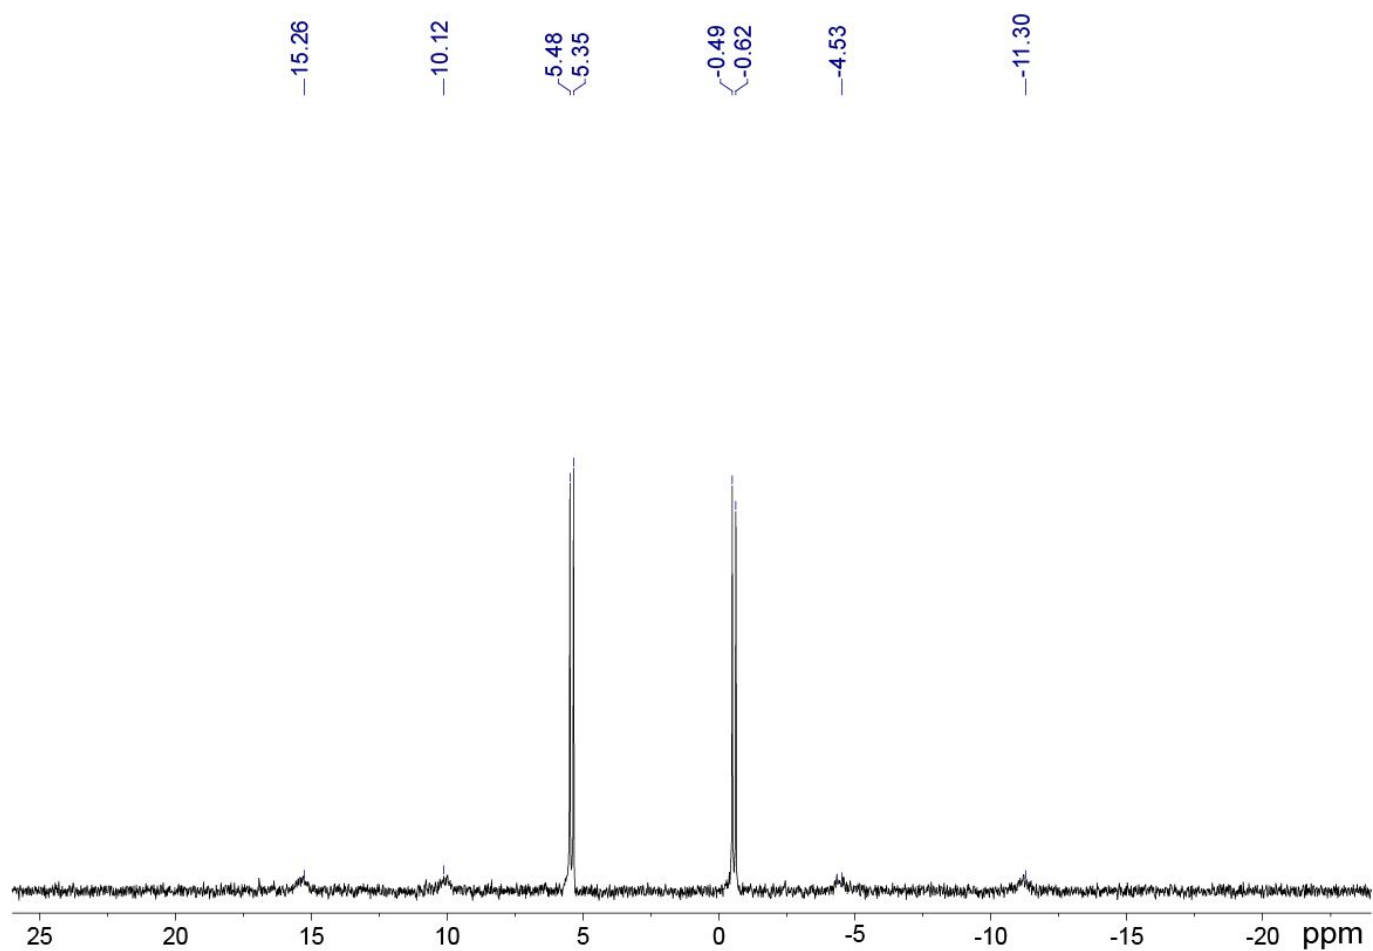

**Figure S8.**  $^{31}\text{P}\{^1\text{H}\}$  NMR spectrum (121.4 MHz,  $\text{CD}_3\text{CN}$ , 295 K) recorded for **4a**.

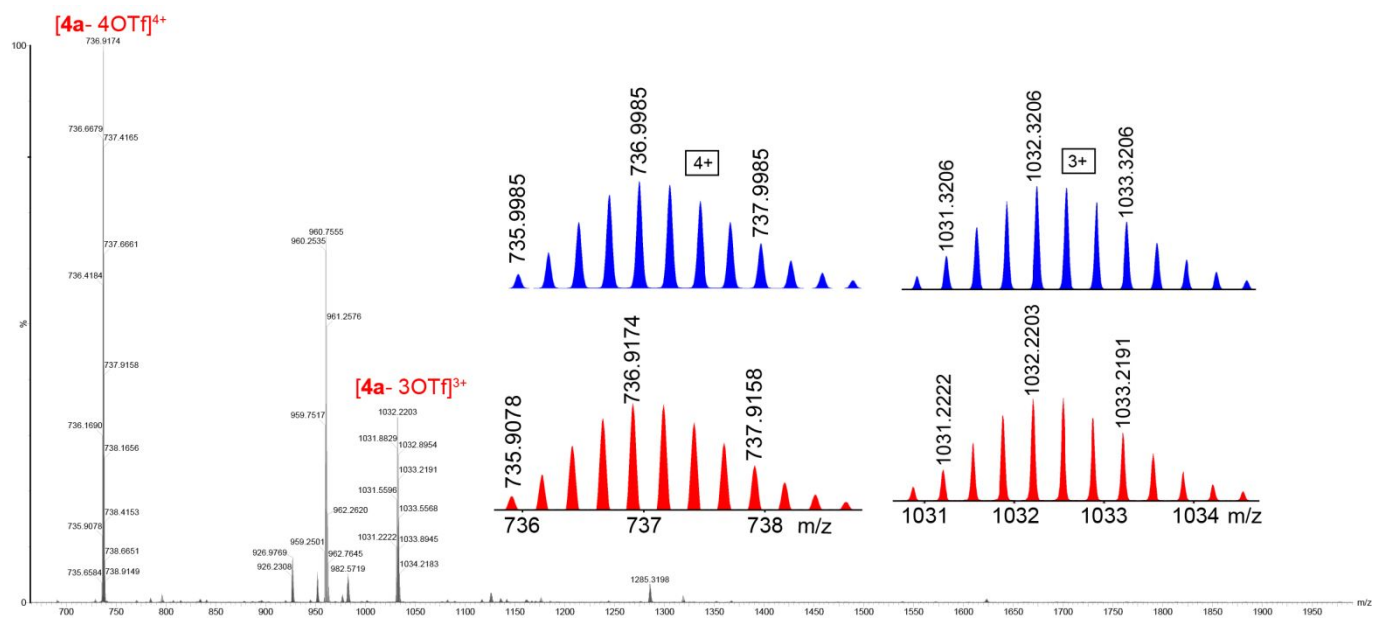

**Figure S9.** ESI-TOF-MS spectrum of **4a**.



## 2.5 Self-assembly of metallacage **4b**

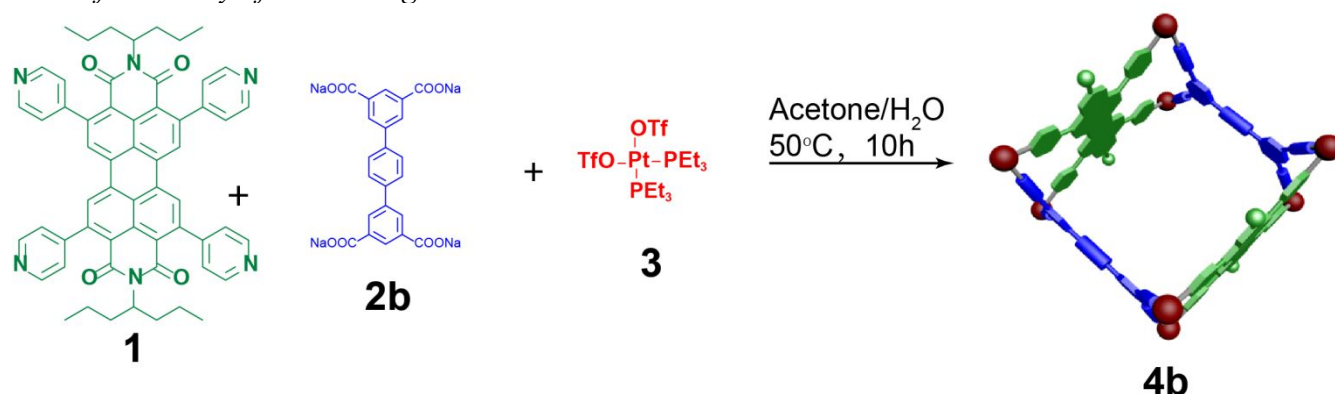

**Figure S10.** Self-assembly of metallacage **4b**.

**1** (5.0 mg, 5.59  $\mu\text{mol}$ ), tetracarboxylate ligand **2b** (2.76 mg, 5.59  $\mu\text{mol}$ ), and *cis*-( $\text{PEt}_3$ )<sub>2</sub>Pt(OTf)<sub>2</sub> (16.30 mg, 22.34  $\mu\text{mol}$ ) were mixed in a 1:1:4 molar ratio and dissolved in acetone/water (5.0 mL, 4:1, v/v). The whole reaction mixture was heated at 50°C for 10 h and then cooled to room temperature. The solvent was removed by nitrogen flow. The residue was redissolved in  $\text{CH}_3\text{CN}$  (1.0 mL) and filtered, and the filtrate was poured into ethyl ether (10.0 mL) to give a precipitate, which was collected by centrifugation to give **4b** (19.0 mg, 94%) as an orange powder.  $^1\text{H}$  NMR (400 MHz,  $\text{CD}_3\text{CN}$ , 295 K)  $\delta$  8.98–8.90 (m, 8H), 8.67–8.69 (m, 8H), 8.37 (s, 8H), 8.25 (d,  $J = 9.8$  Hz, 12H), 7.72 (s, 8H), 7.61 (d,  $J = 5.3$  Hz, 8H), 7.34 (d,  $J = 5.2$  Hz, 8H), 4.71–4.79 (m, 4H), 0.76 (t,  $J = 7.3$  Hz, 24H).  $^{31}\text{P}\{^1\text{H}\}$  NMR (121.4 MHz,  $\text{CD}_3\text{CN}$ , 295 K): 5.14 ppm (d,  $^2J_{\text{P-P}} = 15.8$  Hz,  $^{195}\text{Pt}$  satellites,  $^1J_{\text{Pt-P}} = 2600$  Hz),  $-0.41$  ppm (d,  $^2J_{\text{P-P}} = 15.8$  Hz,  $^{195}\text{Pt}$  satellites,  $^1J_{\text{Pt-P}} = 2600$  Hz). ESI-TOF-MS:  $m/z$  1057.2615 [**4b** – 6OTf] $^{6+}$ , 1298.5774 [**4b** – 5OTf] $^{5+}$ , 1660.4084 [**4b** – 4OTf] $^{4+}$  and 2263.5923 [**4b** – 3OTf] $^{3+}$ .

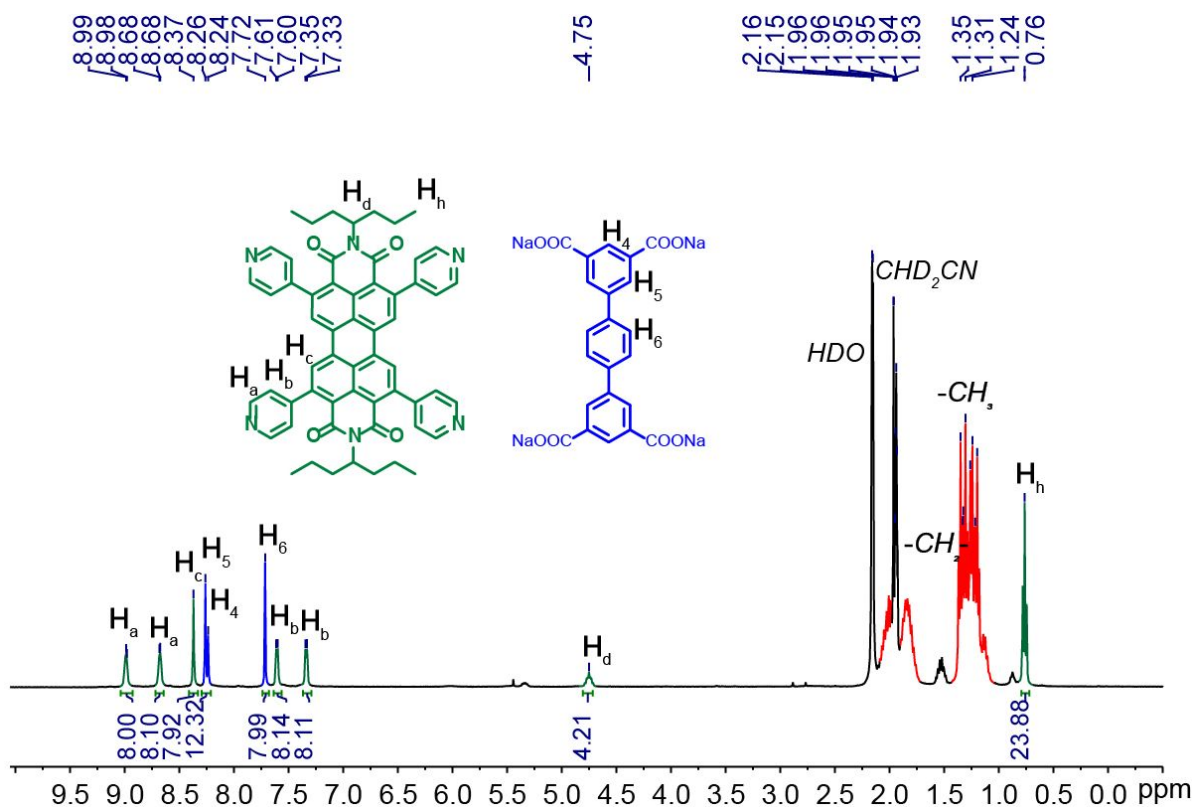

**Figure S11.**  $^1\text{H}$  NMR spectrum (400 MHz,  $\text{CD}_3\text{CN}$ , 295 K) recorded for **4b**.

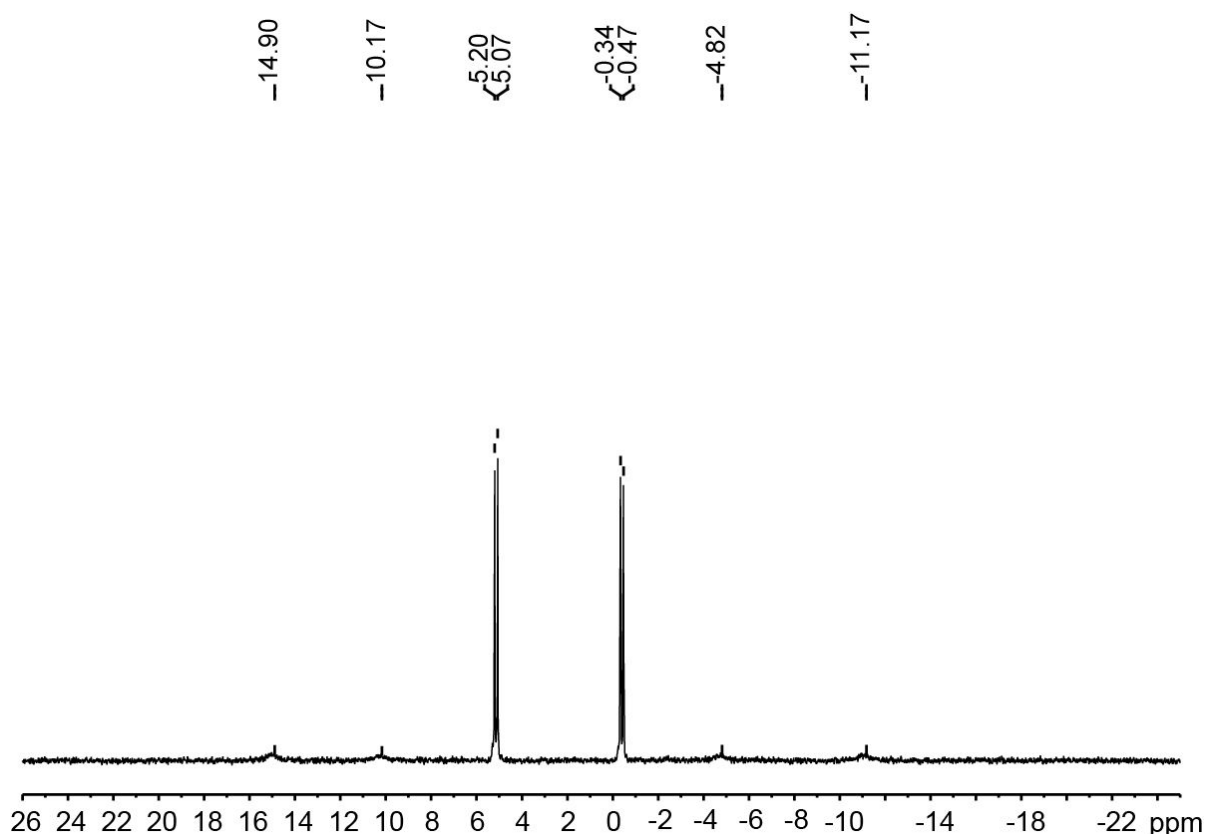

**Figure S12.**  $^{31}\text{P}\{^1\text{H}\}$  NMR spectrum (121.4 MHz,  $\text{CD}_3\text{CN}$ , 295 K) recorded for **4b**.

## 2.6 Self-assembly of metallacage **4c**

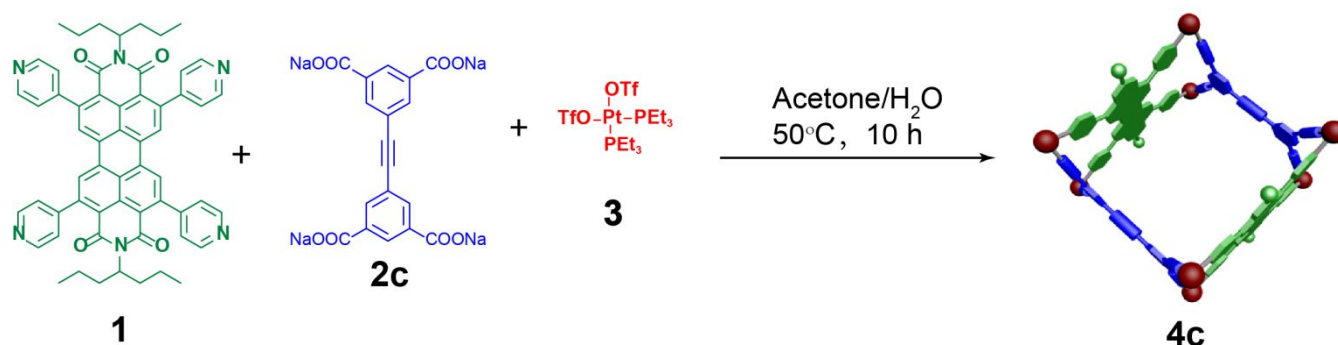

**Figure S13.** Self-assembly of metallacage **4c**.

**1** (5.0 mg, 5.59  $\mu\text{mol}$ ), tetracarboxylate ligand **2c** (2.47 mg, 5.59  $\mu\text{mol}$ ), and *cis*-( $\text{PEt}_3$ ) $_2$ Pt(OTf) $_2$  (16.30 mg, 22.34  $\mu\text{mol}$ ) were mixed in a 1:1:4 molar ratio and dissolved in acetone/water (5.0 mL, 4:1, v/v). The whole reaction mixture was heated at 50°C for 10 h and then cooled to room temperature. The solvent was removed by nitrogen flow. The residue was redissolved in  $\text{CH}_3\text{CN}$  (1.0 mL) and filtered, and the filtrate was poured into ethyl ether (10.0 mL) to give a precipitate, which was collected by centrifugation to give **4c** (18.35 mg, 92%) as an orange powder.  $^1\text{H}$  NMR (400 MHz,  $\text{CD}_3\text{CN}$ , 295 K)  $\delta$  8.96–8.98 (m, 8H), 8.72–8.74 (m, 8H), 8.36 (s, 8H), 8.22 (s, 4H), 8.12 (d,  $J$  = 1.0 Hz, 8H), 7.58 (d,  $J$  = 5.0 Hz, 8H), 7.36 (d,  $J$  = 5.1 Hz, 8H), 4.71–4.79 (m, 4H), 0.76 (t,  $J$  = 7.3 Hz, 24H).  $^{31}\text{P}\{^1\text{H}\}$  NMR (121.4 MHz,  $\text{CD}_3\text{CN}$ ,

295 K): 5.22 ppm (d,  $^2J_{\text{P-P}} = 15.8$  Hz,  $^{195}\text{Pt}$  satellites,  $^1J_{\text{Pt-P}} = 2591.89$  Hz),  $-0.51$  ppm (d,  $^2J_{\text{P-P}} = 15.8$  Hz,  $^{195}\text{Pt}$  satellites,  $^1J_{\text{Pt-P}} = 2591.89$  Hz). ESI-TOF-MS:  $m/z$  1277.7677 [**4c** – 5OTf] $^{5+}$ , 1634.4457 [**4c** – 4OTf] $^{4+}$  and 2228.9094 [**4c** – 3OTf] $^{3+}$ .

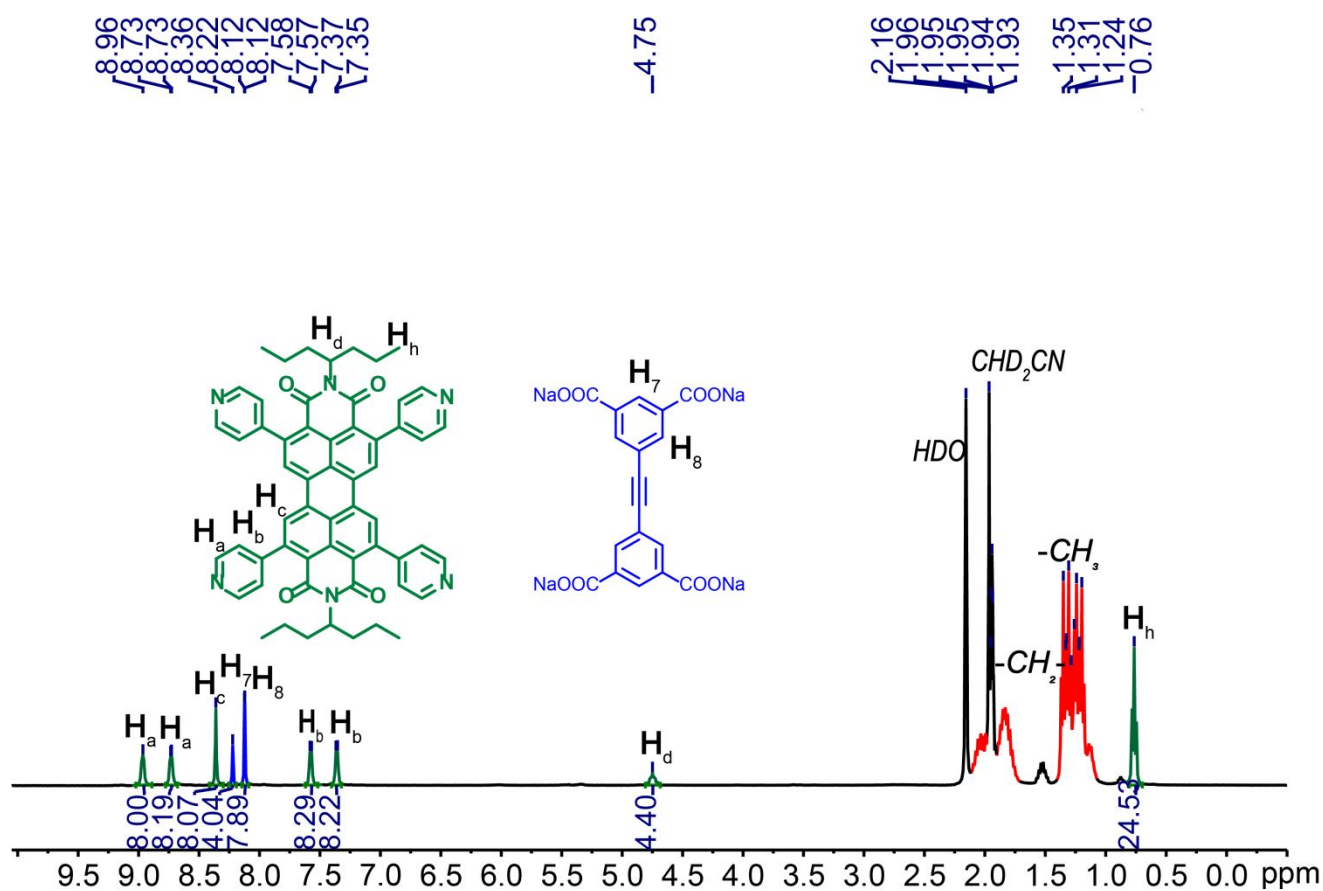

**Figure S14.**  $^1\text{H}$  NMR spectrum (400 MHz,  $\text{CD}_3\text{CN}$ , 295 K) recorded for **4c**.

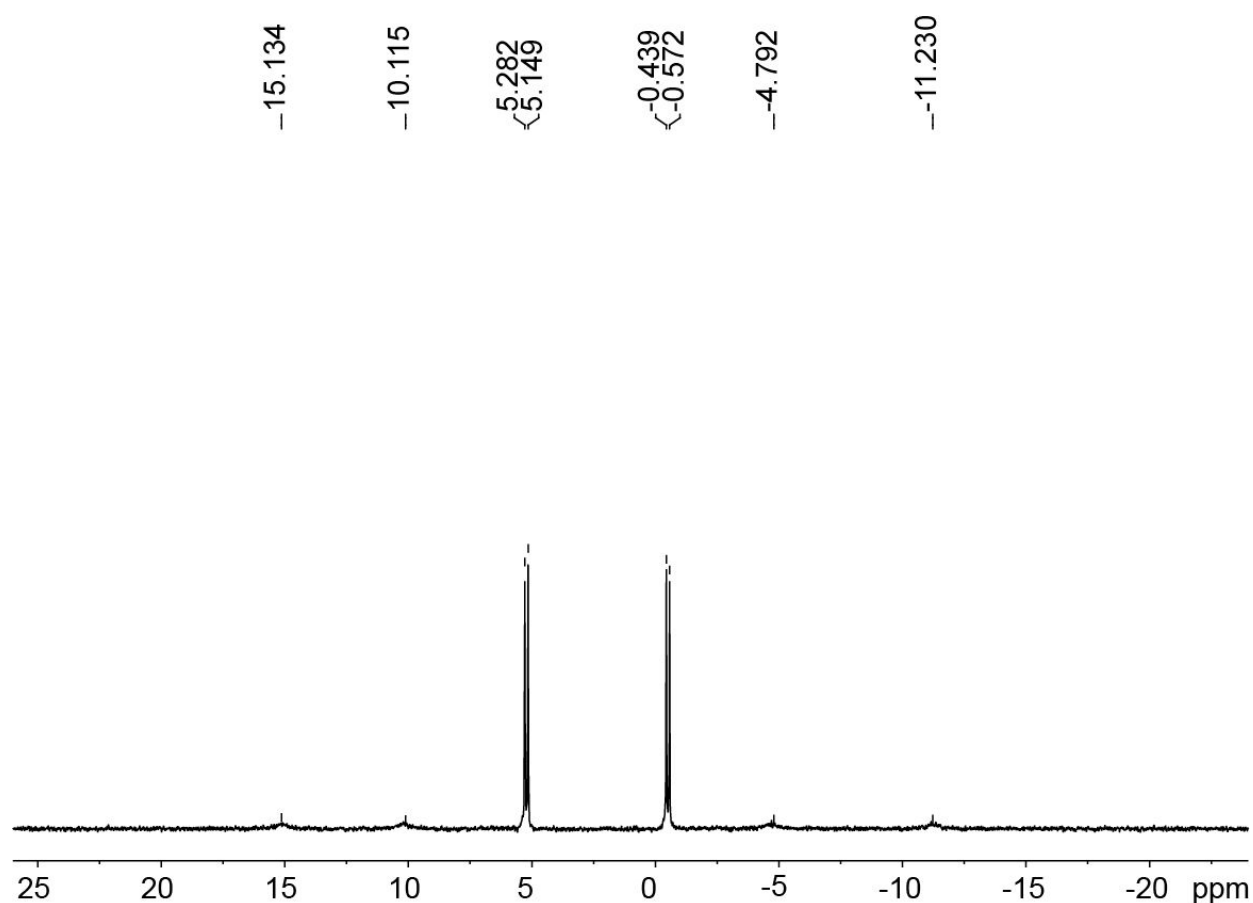

**Figure S15.**  $^{31}\text{P}\{^1\text{H}\}$  NMR spectrum (121.4 MHz,  $\text{CD}_3\text{CN}$ , 295 K) recorded for **4c**.

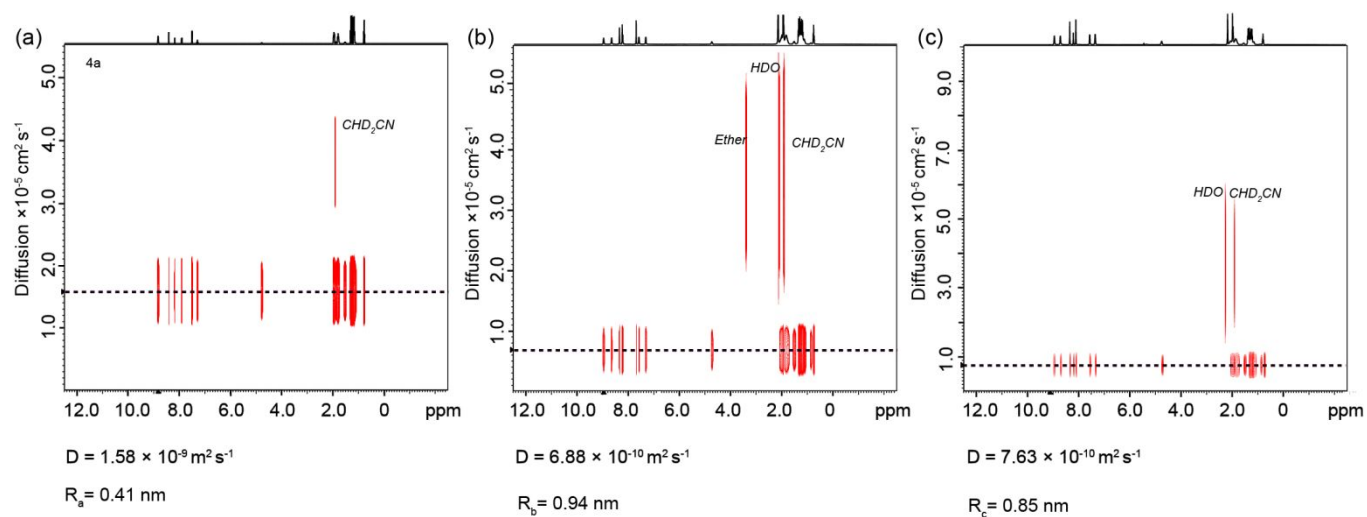

**Figure S16.** 2D  $^1\text{H}$  DOSY spectra (400 MHz,  $\text{CD}_3\text{CN}$ , 295 K) recorded for (a) metallacycle **4a**, metallacages (b) **4b** and (c) **4c**.

### 3. X-ray structure determination

Table S1. Crystallographic data and refinement details for compounds **4a**, **4b** and **4c**

| Compound                                                                             | <b>4a</b>                                                                                                                     | <b>4b</b>                                                                                                                        | <b>4c</b>                                                                                                                        |
|--------------------------------------------------------------------------------------|-------------------------------------------------------------------------------------------------------------------------------|----------------------------------------------------------------------------------------------------------------------------------|----------------------------------------------------------------------------------------------------------------------------------|
| Empirical formula                                                                    | C <sub>125</sub> H <sub>178</sub> F <sub>9</sub> N <sub>6</sub> O <sub>21</sub> P <sub>8</sub> Pt <sub>4</sub> S <sub>3</sub> | C <sub>268</sub> H <sub>374</sub> F <sub>12</sub> N <sub>12</sub> O <sub>40</sub> P <sub>16</sub> Pt <sub>8</sub> S <sub>4</sub> | C <sub>278</sub> H <sub>398</sub> F <sub>24</sub> N <sub>14</sub> O <sub>58</sub> P <sub>16</sub> Pt <sub>8</sub> S <sub>8</sub> |
| Fw                                                                                   | 3396.02                                                                                                                       | 6816.25                                                                                                                          | 6816.25                                                                                                                          |
| Crystal system                                                                       | Triclinic                                                                                                                     | Triclinic                                                                                                                        | Triclinic                                                                                                                        |
| Space group                                                                          | <i>P</i> -1                                                                                                                   | <i>P</i> -1                                                                                                                      | <i>P</i> -1                                                                                                                      |
| <i>a</i> /Å                                                                          | 15.0681(5)                                                                                                                    | 20.8686 (12)                                                                                                                     | 21.295(6)                                                                                                                        |
| <i>b</i> /Å                                                                          | 23.3192(6)                                                                                                                    | 23.3807 (15)                                                                                                                     | 24.991(6)                                                                                                                        |
| <i>c</i> /Å                                                                          | 28.0394(7)                                                                                                                    | 26.270 (2)                                                                                                                       | 27.539(7)                                                                                                                        |
| $\alpha$ /°                                                                          | 72.453(2)                                                                                                                     | 107.418 (4)                                                                                                                      | 71.721(3)                                                                                                                        |
| $\beta$ /°                                                                           | 77.385(2)                                                                                                                     | 113.195 (2)                                                                                                                      | 70.657(3)                                                                                                                        |
| $\gamma$ /°                                                                          | 78.928(2)                                                                                                                     | 94.271(3)                                                                                                                        | 71.100(3)                                                                                                                        |
| <i>V</i> /Å <sup>3</sup>                                                             | 9082.5(5)                                                                                                                     | 10967.6(13)                                                                                                                      | 12728(6)                                                                                                                         |
| <i>Z</i>                                                                             | 2                                                                                                                             | 1                                                                                                                                | 1                                                                                                                                |
| <i>D</i> <sub>calc</sub> /g cm <sup>-3</sup>                                         | 1.242                                                                                                                         | 1.032                                                                                                                            | 0.996                                                                                                                            |
| <i>F</i> (000)                                                                       | 3398.0                                                                                                                        | 3422.0                                                                                                                           | 3836.0                                                                                                                           |
| $\mu$ /mm <sup>-1</sup>                                                              | 4.956                                                                                                                         | 3.940                                                                                                                            | 2.326                                                                                                                            |
| $\theta$ max                                                                         | 61.018                                                                                                                        | 59.981                                                                                                                           | 24.232                                                                                                                           |
| Independent reflns                                                                   | 27380                                                                                                                         | 31822                                                                                                                            | 23105                                                                                                                            |
| Reflns [ <i>I</i> > 2 $\sigma$ ( <i>I</i> )]                                         | 40437                                                                                                                         | 48184                                                                                                                            | 40147                                                                                                                            |
| <i>R</i> <sub>1</sub> ; <i>wR</i> <sub>2</sub> [ <i>I</i> > 2 $\sigma$ ( <i>I</i> )] | 0.1098; 0.2264                                                                                                                | 0.1181; 0.3940                                                                                                                   | 0.0824; 0.2797                                                                                                                   |

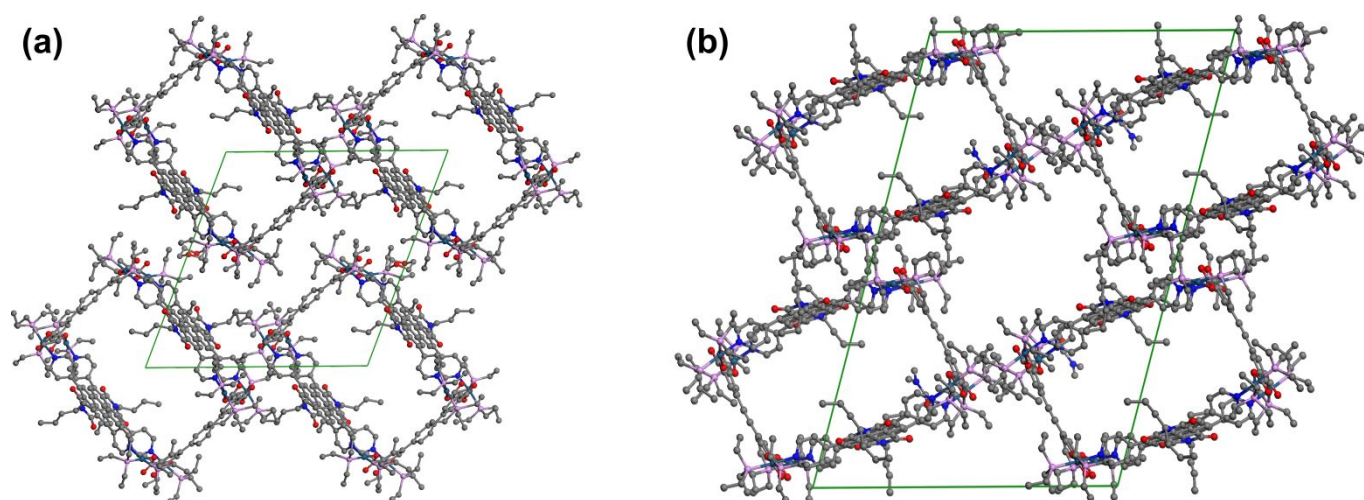

**Figure S17.** Packing mode of crystal structures of (a) **4b** and (b) **4c**. Hydrogen atoms, counterions and solvent molecules were omitted for clarity.



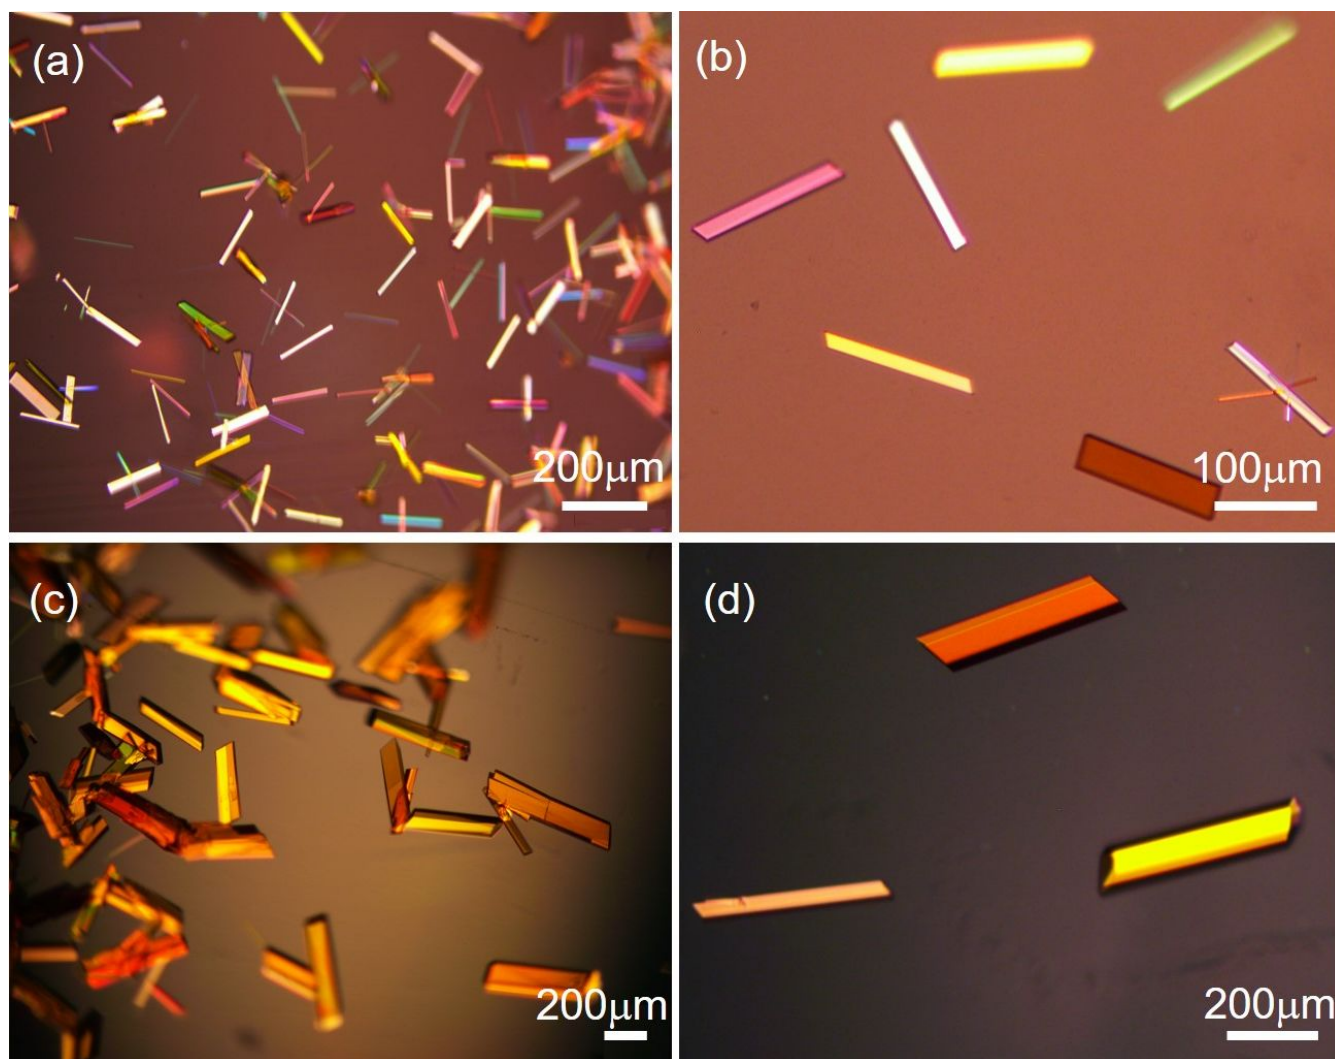

**Figure S18.** Optical images of crystals of metallacages (a, b) **4b** and (c, d) **4c**.

#### 4. Measurements of absolute fluorescence quantum yields

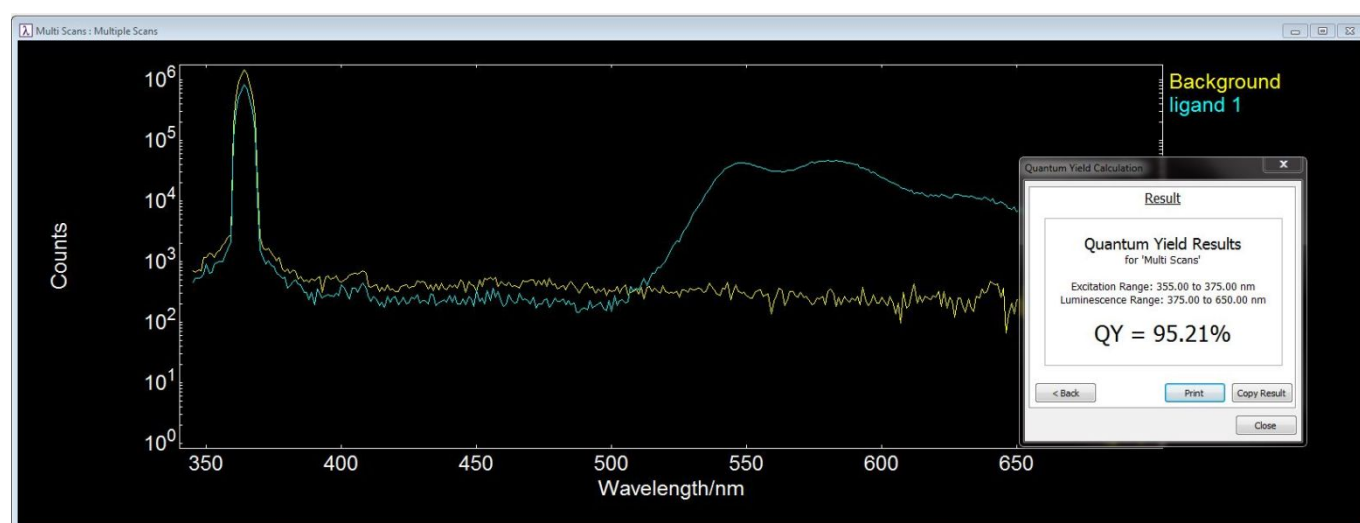

**Figure S19.** Absolute fluorescence quantum yield of ligand **1** in  $\text{CH}_3\text{CN}$ .

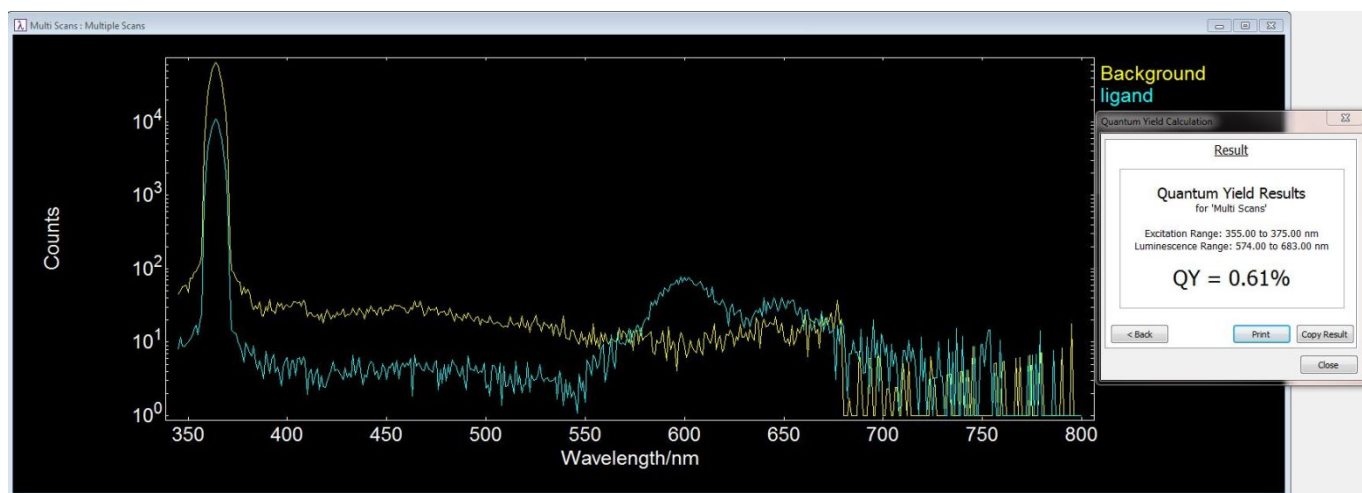

**Figure S20.** Absolute fluorescence quantum yield of ligand **1** in solid state.

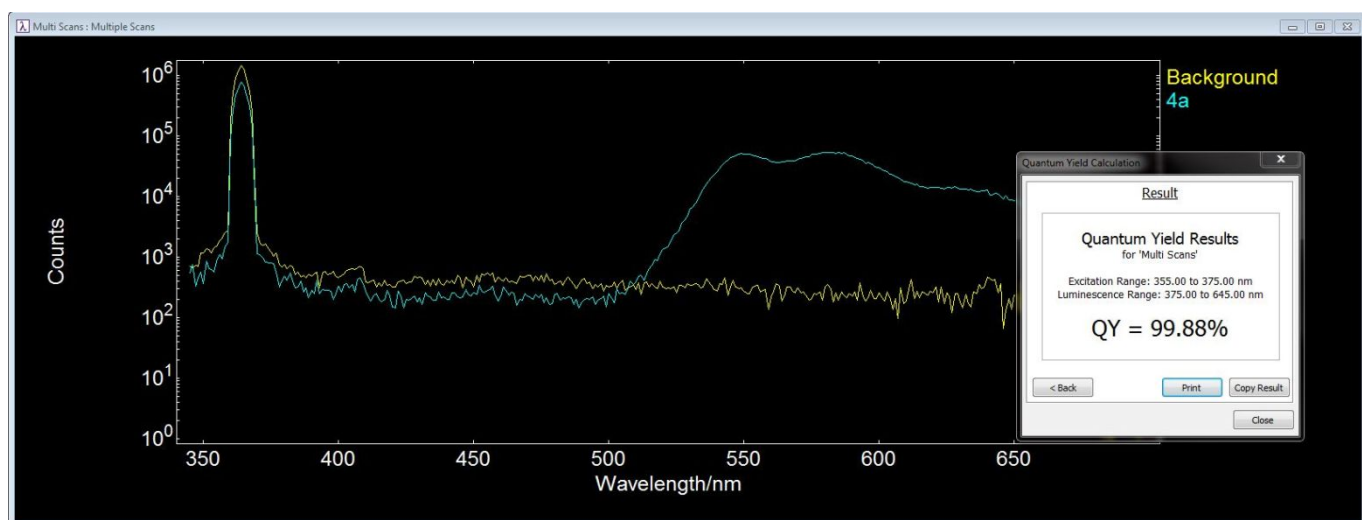

**Figure S21.** Absolute fluorescence quantum yield of metallacycle **4a** in  $\text{CH}_3\text{CN}$ .

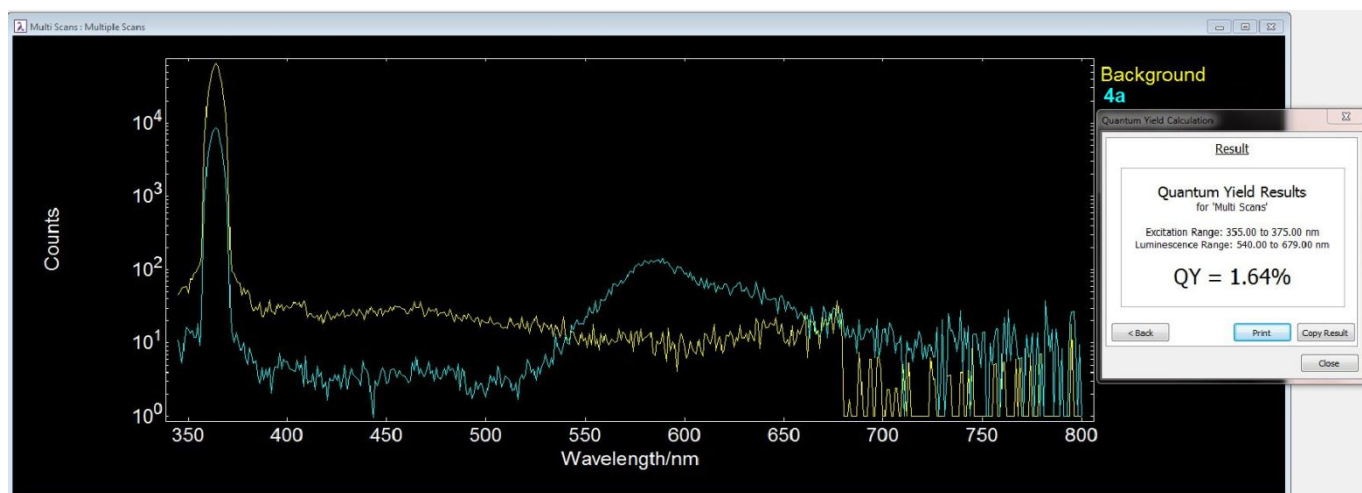

**Figure S22.** Absolute fluorescence quantum yield of metallacycle **4a** in solid state.

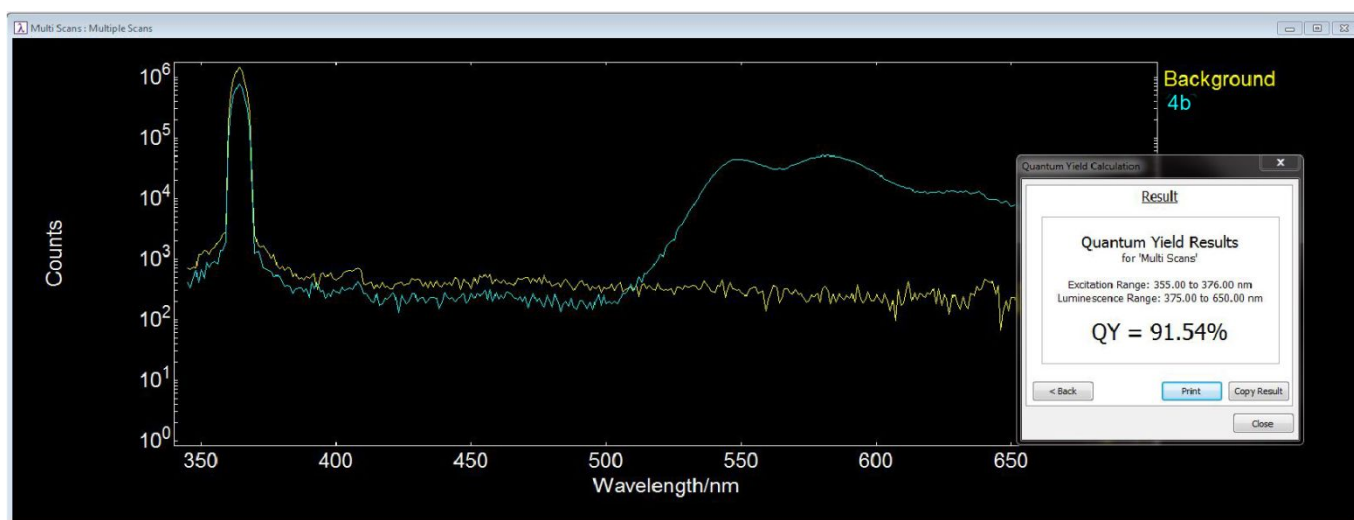

**Figure S23.** Absolute fluorescence quantum yield of metallacage **4b** in  $\text{CH}_3\text{CN}$ .

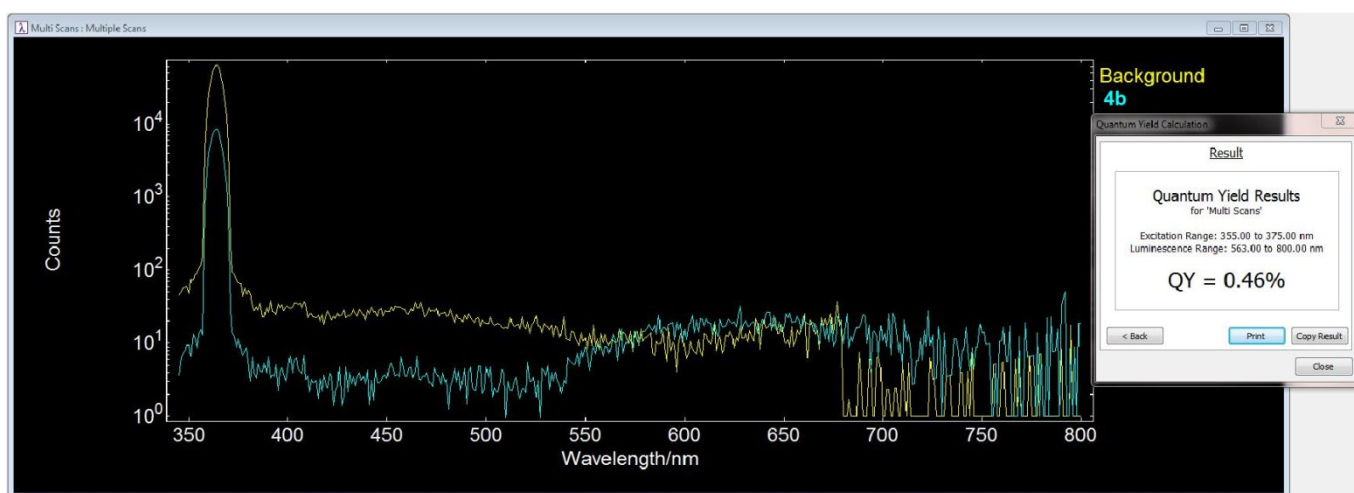

**Figure S24.** Absolute fluorescence quantum yield of metallacage **4b** in solid state.

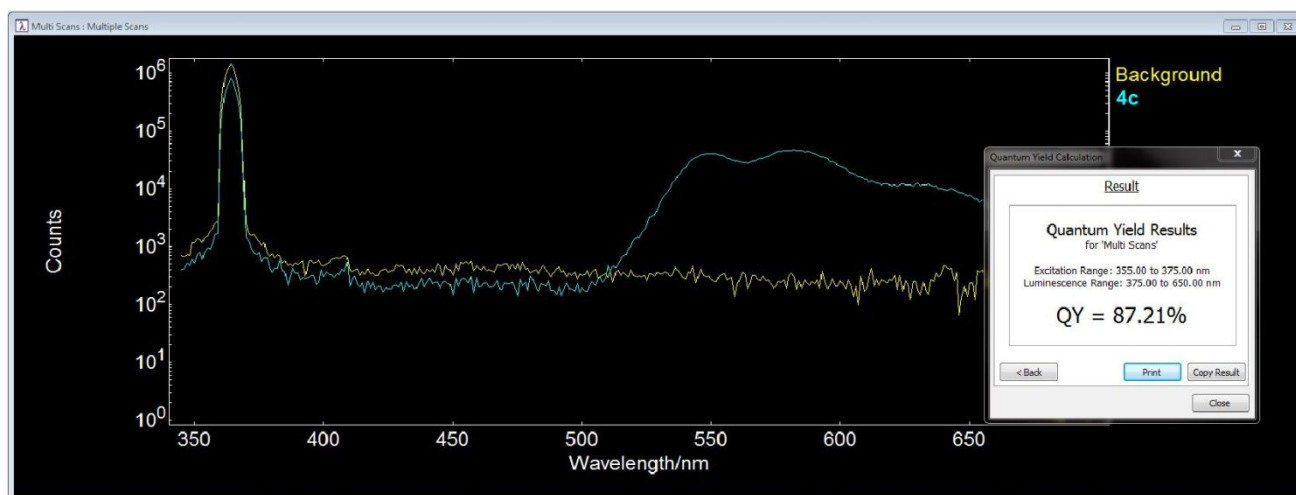

**Figure S25.** Absolute fluorescence quantum yield of metallacage **4c** in  $\text{CH}_3\text{CN}$ .



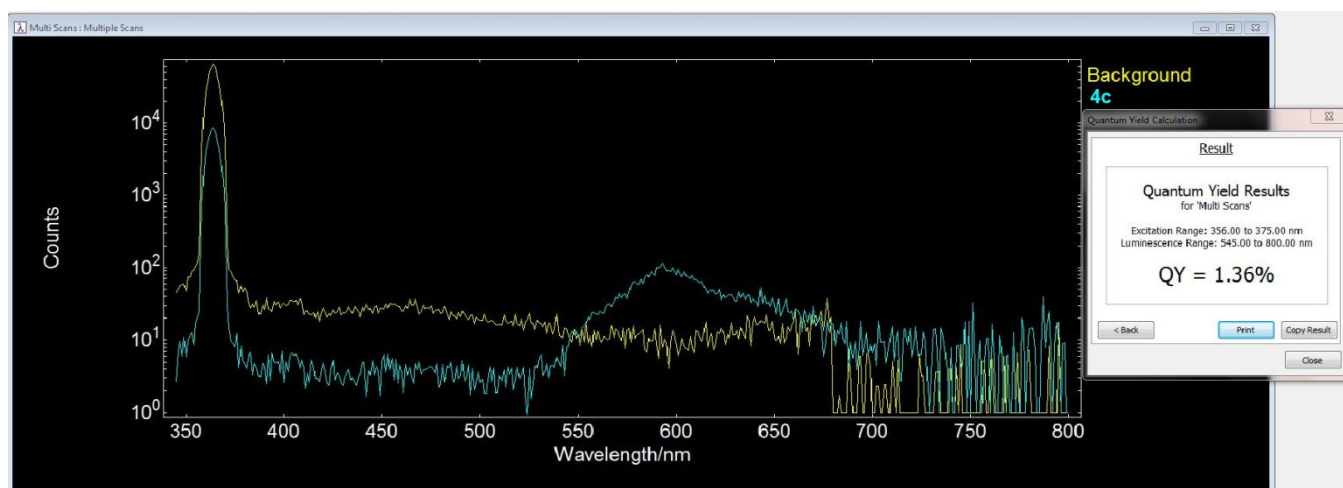

**Figure S26.** Absolute fluorescence quantum yield of metallacage **4c** in solid state.

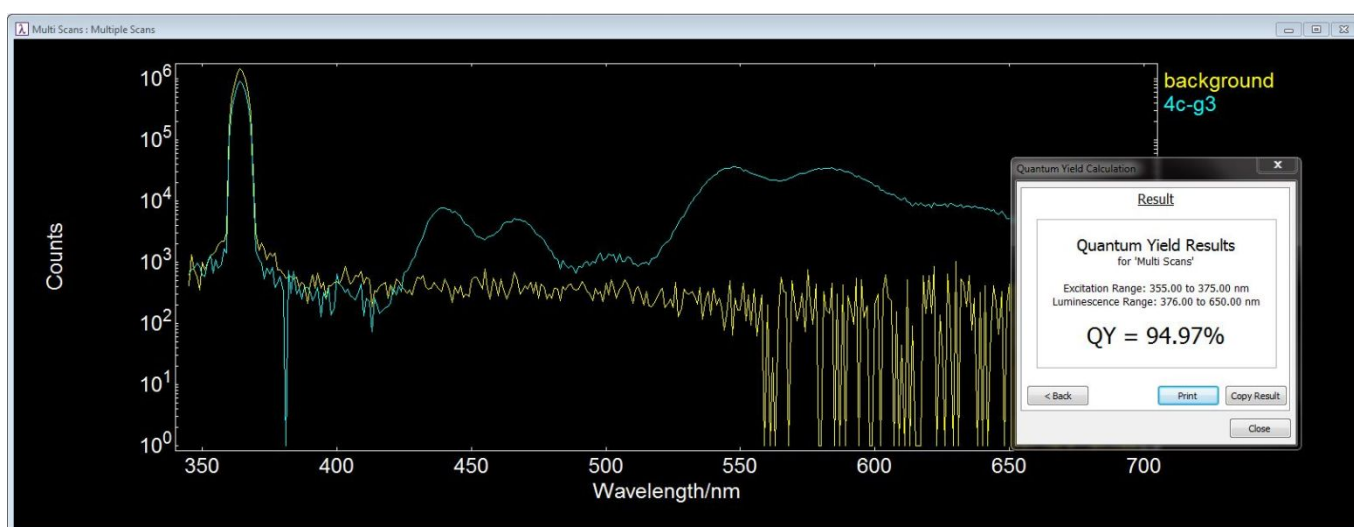

**Figure S27.** Absolute fluorescence quantum yield of metallacage **4cG<sub>3</sub>** in  $\text{CH}_3\text{CN}$ .

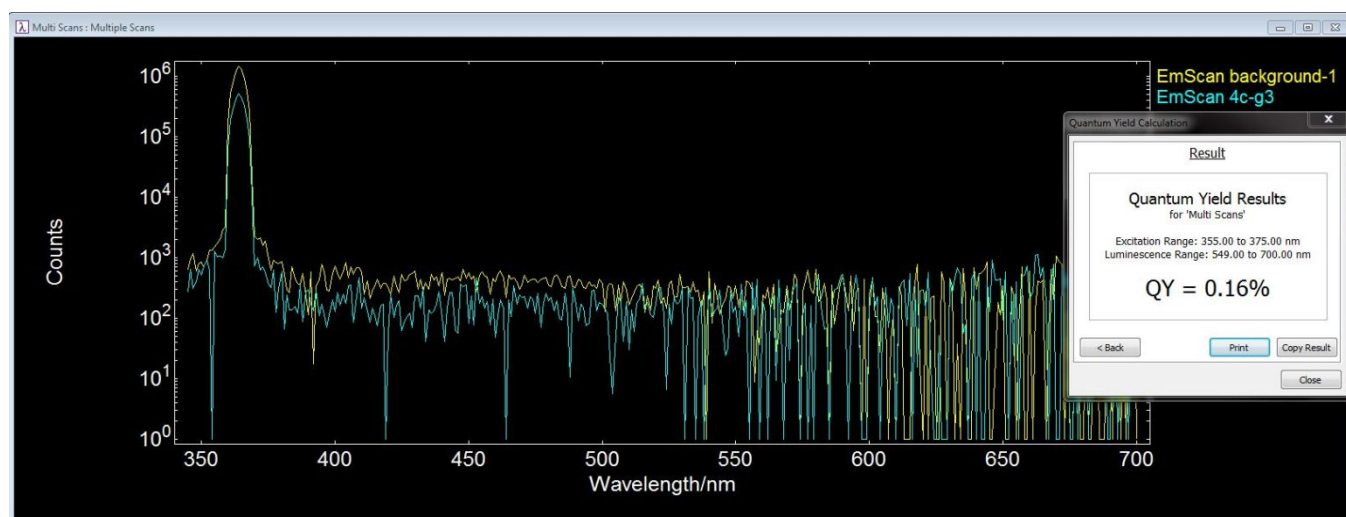

**Figure S28.** Absolute fluorescence quantum yield of metallacage **4cG<sub>3</sub>** in solid state.

## 5. Fluorescence decay traces and lifetime

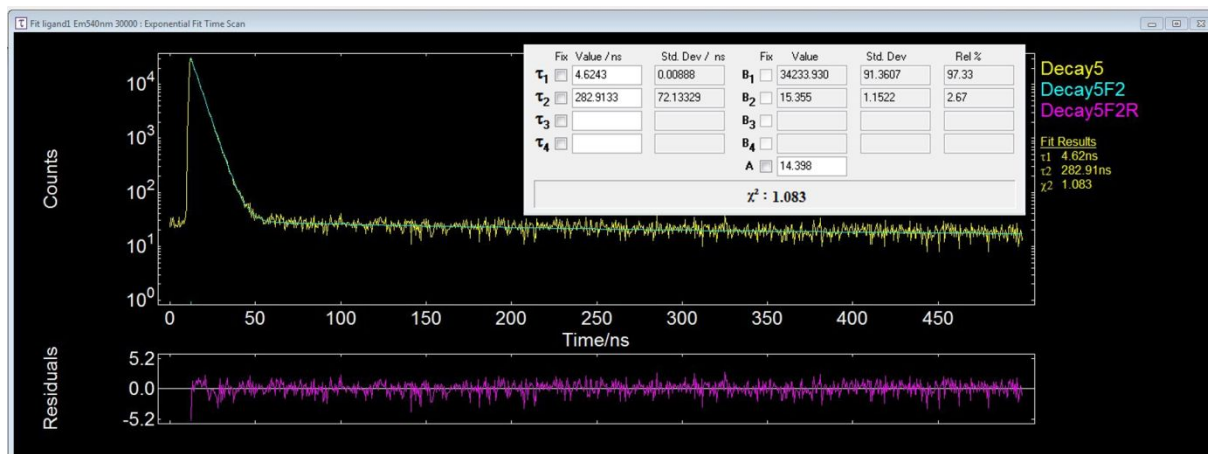

**Figure S29.** Fitting spectra of fluorescence decays of **1**, monitored at 540 nm with an excitation wavelength of 375 nm.

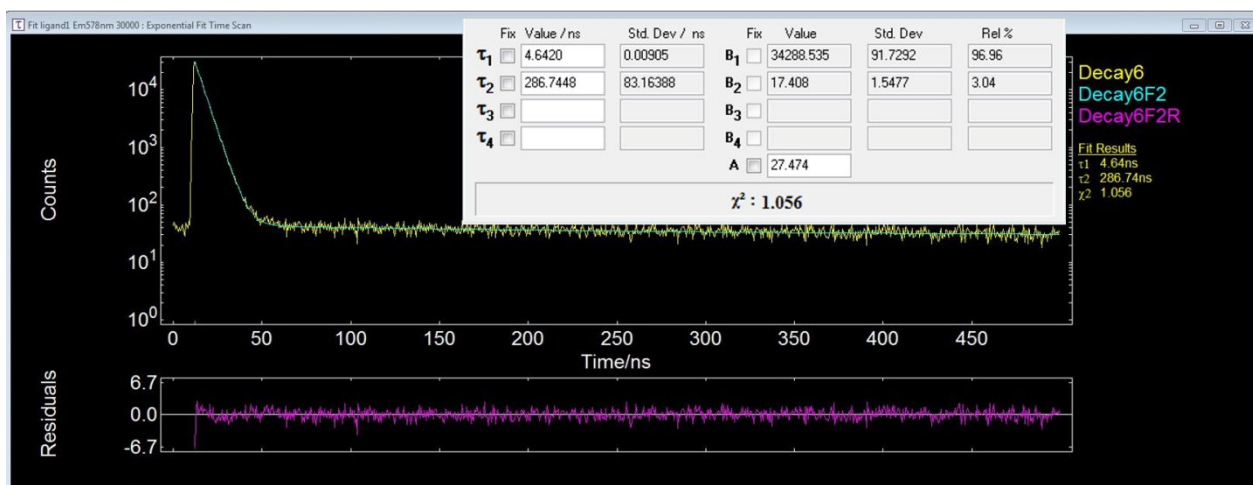

**Figure S30.** Fitting spectra of fluorescence decays of **1**, monitored at 578 nm with an excitation wavelength of 375 nm.

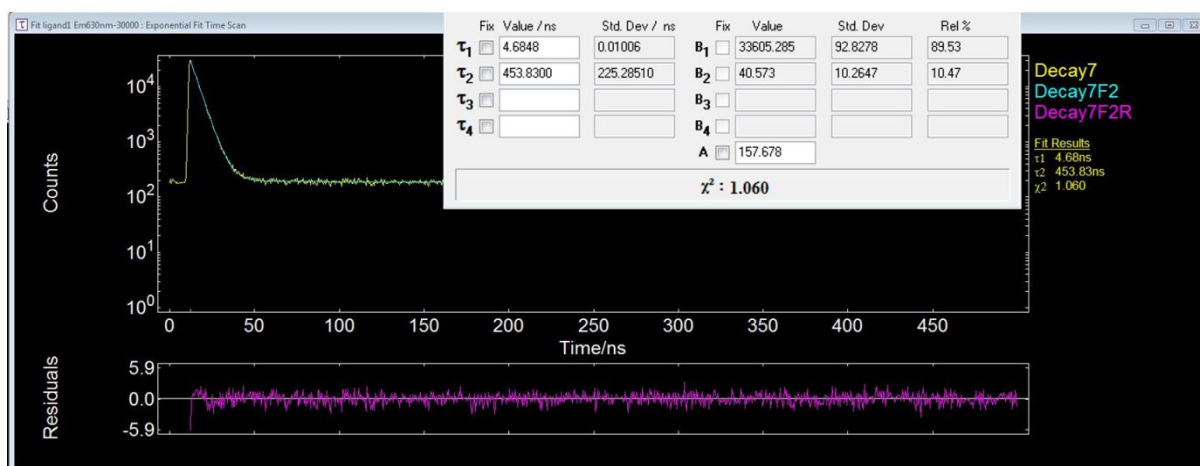

**Figure S31.** Fitting spectra of fluorescence decays of **4a**, monitored at 540 nm with an excitation wavelength of 375 nm.

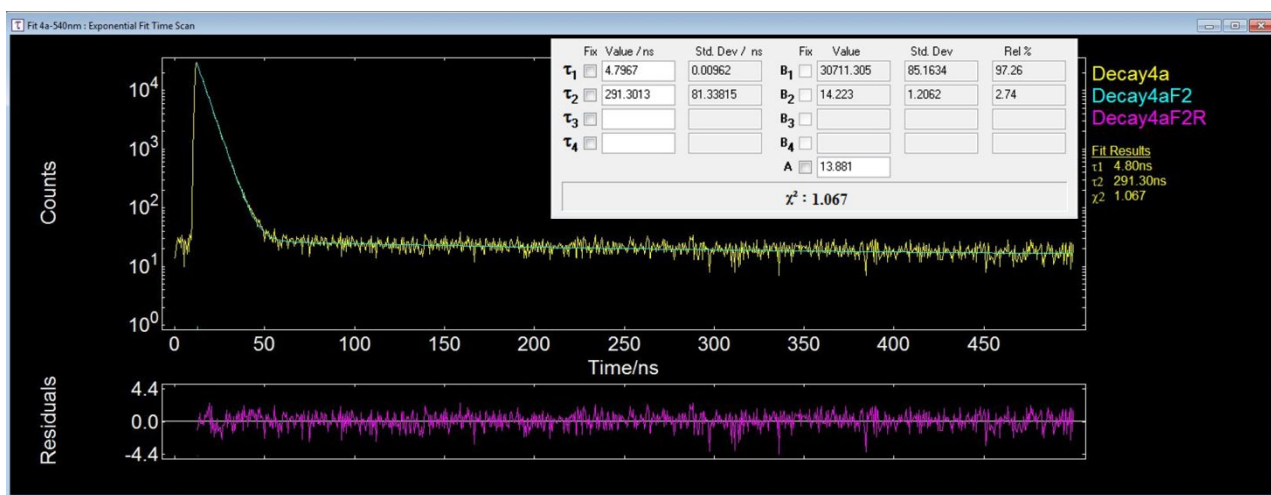

**Figure S32.** Fitting spectra of fluorescence decays of **4a**, monitored at 578 nm with an excitation wavelength of 375 nm.

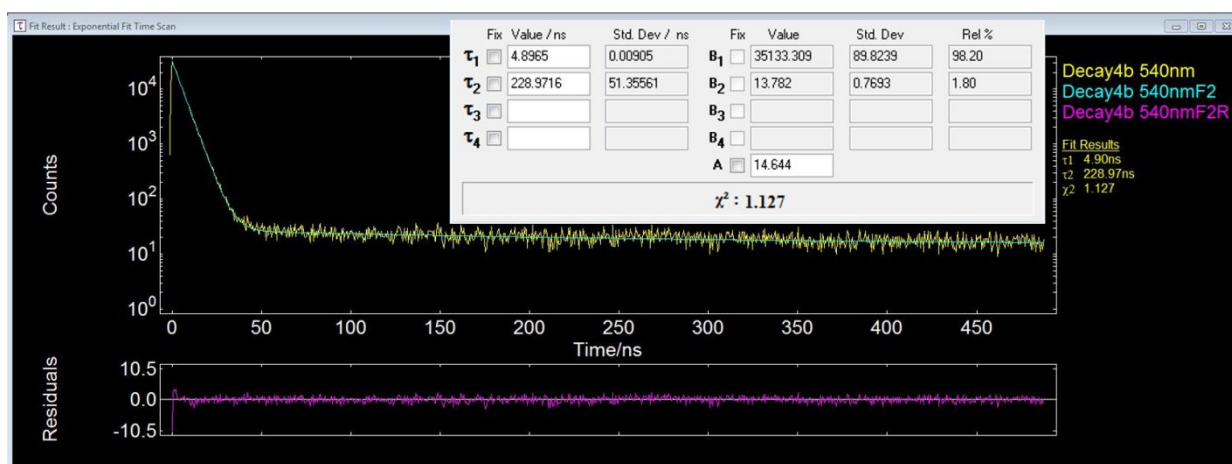

**Figure S33.** Fitting spectra of fluorescence decays of **4b**, monitored at 540 nm with an excitation wavelength of 375 nm.

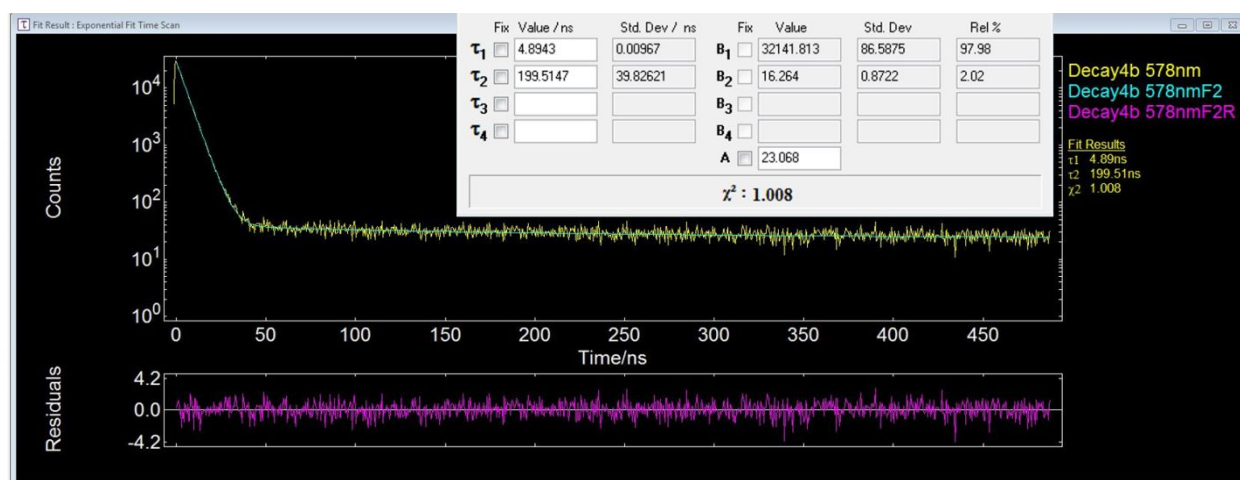

**Figure S34.** Fitting spectra of fluorescence decays of **4b**, monitored at 578 nm with an excitation wavelength of 375 nm.

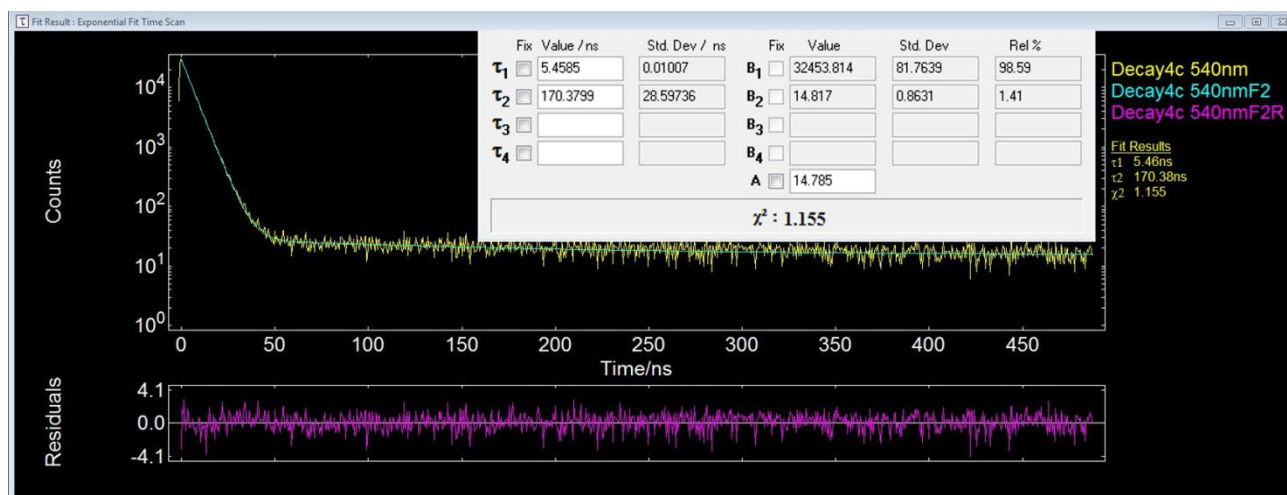

**Figure S35.** Fitting spectra of fluorescence decays of **4c**, monitored at 540 nm with an excitation wavelength of 375 nm.

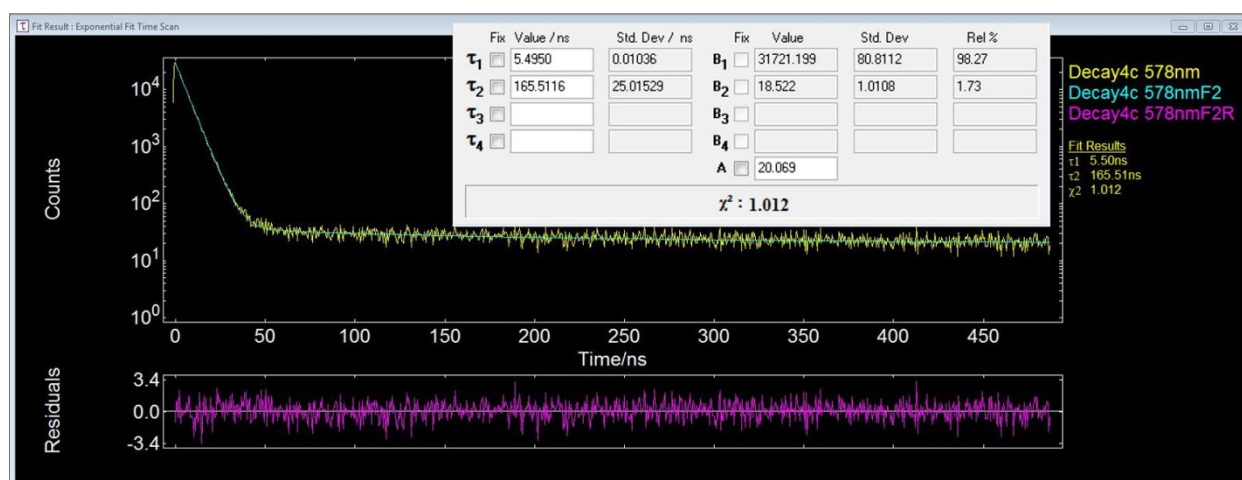

**Figure S36.** Fitting spectra of fluorescence decays of **4c**, monitored at 578 nm with an excitation wavelength of 375 nm.

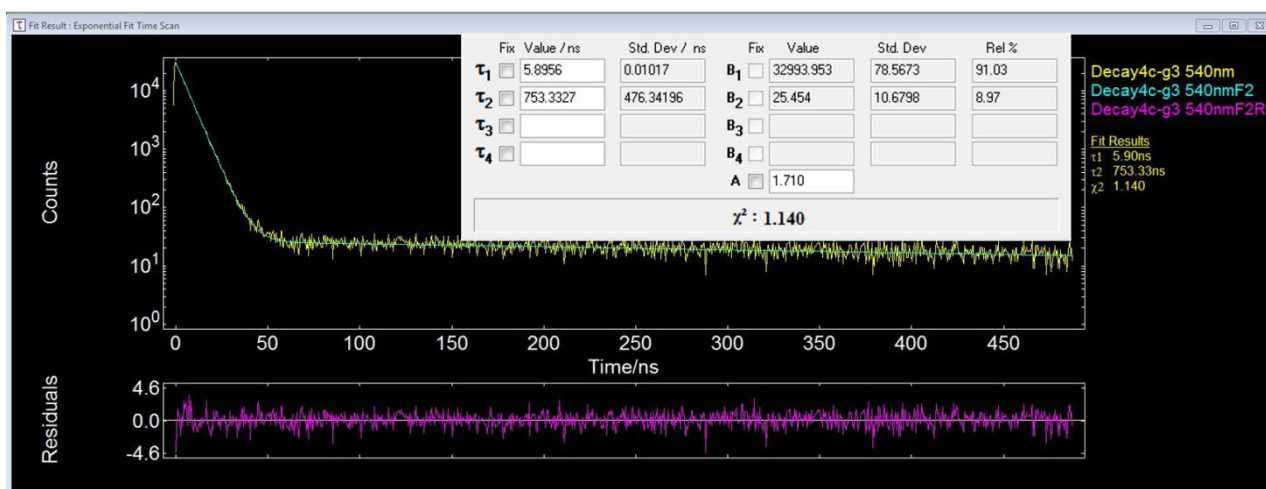

**Figure S37.** Fitting spectra of fluorescence decays of **4cG<sub>3</sub>**, monitored at 540 nm with an excitation wavelength of 375 nm.



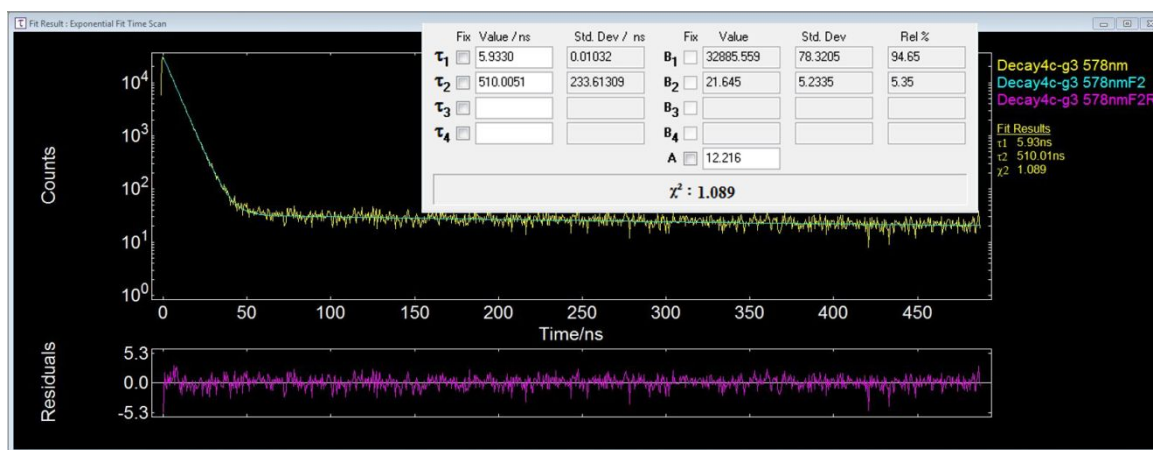

**Figure S38.** Fitting spectra of fluorescence decays of **4c**⊃**G**<sub>3</sub>, monitored at 578 nm with an excitation wavelength of 375 nm.

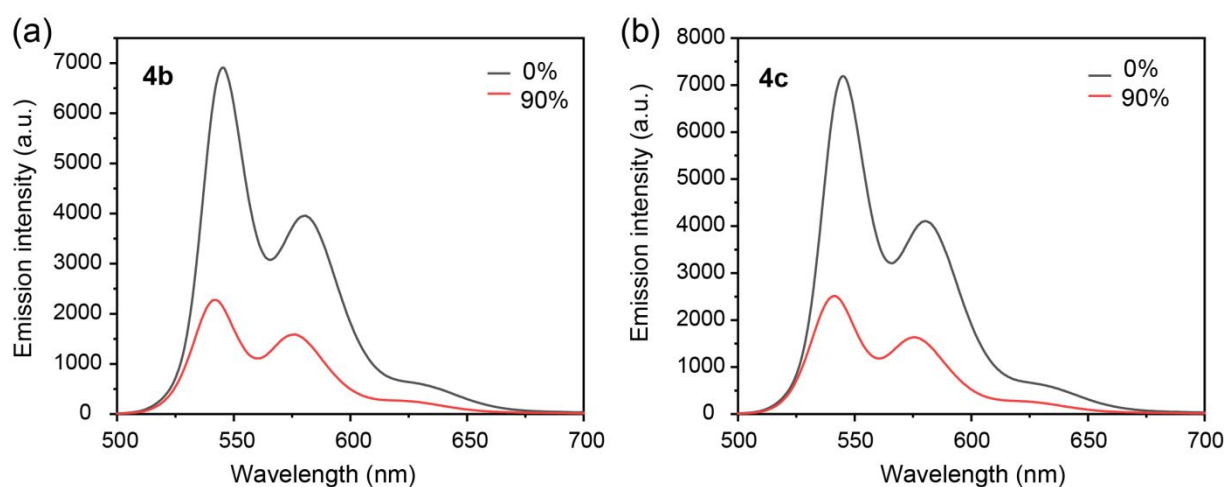

**Figure S39.** Emission spectra of metallacages (a) **4b** and (b) **4c** in acetonitrile with different fraction of diethyl ether.

**Table S2** Fitting results of lifetime for **1**, **4a**, **4b**, **4c** and **4c**⊃**G**<sub>3</sub>.

|                                   | 540 nm                   |                          | 578 nm                   |                          |
|-----------------------------------|--------------------------|--------------------------|--------------------------|--------------------------|
|                                   | $\tau_1$ (ns)<br>and Rel | $\tau_2$ (ns)<br>and Rel | $\tau_1$ (ns)<br>and Rel | $\tau_2$ (ns)<br>and Rel |
| <b>Ligand 1</b>                   | 4.62<br>(97.33 %)        | 282.91<br>(2.67 %)       | 4.64<br>( 96.96 %)       | 286.75<br>(3.04 %)       |
| <b>4a</b>                         | 4.79<br>(97.26 %)        | 291.30<br>(2.74 %)       | 4.80<br>( 97.37 %)       | 233.06<br>(2.63 %)       |
| <b>4b</b>                         | 4.90<br>(98.20 %)        | 228.97<br>(1.80 %)       | 4.89<br>(97.98 %)        | 199.51<br>(2.02 %)       |
| <b>4c</b>                         | 5.45<br>(98.59 %)        | 170.38<br>(1.41 %)       | 5.49<br>(98.27 %)        | 165.51<br>(1.73 %)       |
| <b>4c</b> ⊃ <b>G</b> <sub>3</sub> | 5.90<br>(91.03 %)        | 753.33<br>(8.97 %)       | 5.93<br>(94.65 %)        | 510.00<br>(5.35 %)       |

## 6. Host-guest complexation study

### 6.1 Determination of stoichiometry by UV-vis absorption spectra

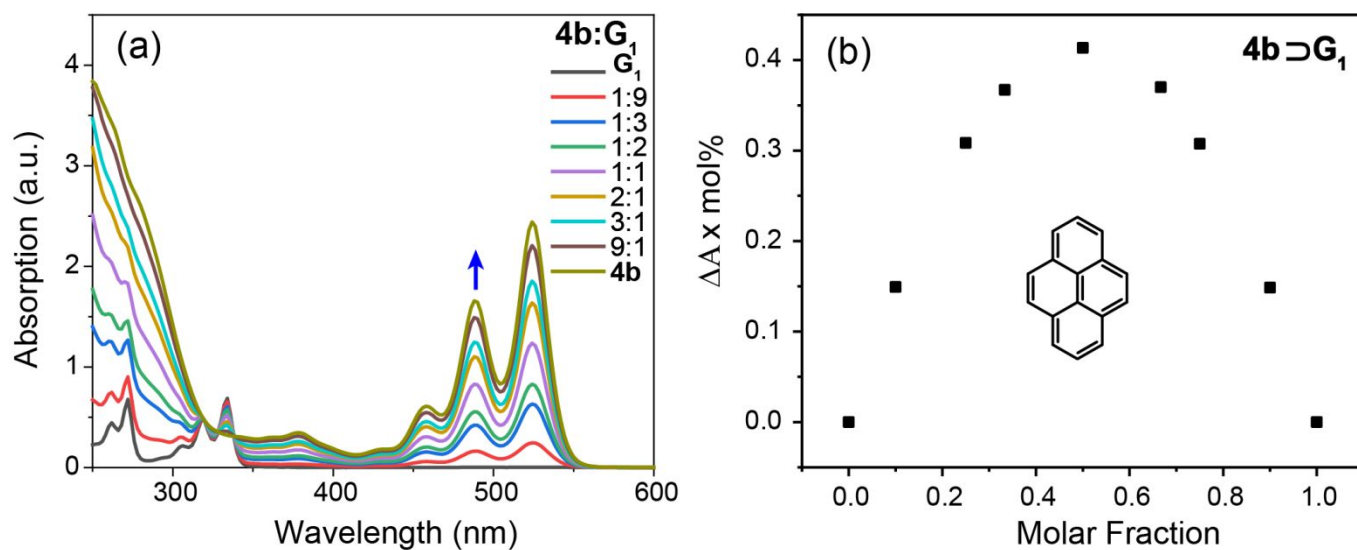

**Figure S40.** (a) UV-vis absorption of metallacage **4b** with guest **G**<sub>1</sub> in different molar ratios ( $[\mathbf{4b}] + [\mathbf{G}_1] = 10 \mu\text{M}$ ).

(b) Job's plot of the complex **4b** ⊃ **G**<sub>1</sub> in CH<sub>3</sub>CN, showing a 1:1 stoichiometry.

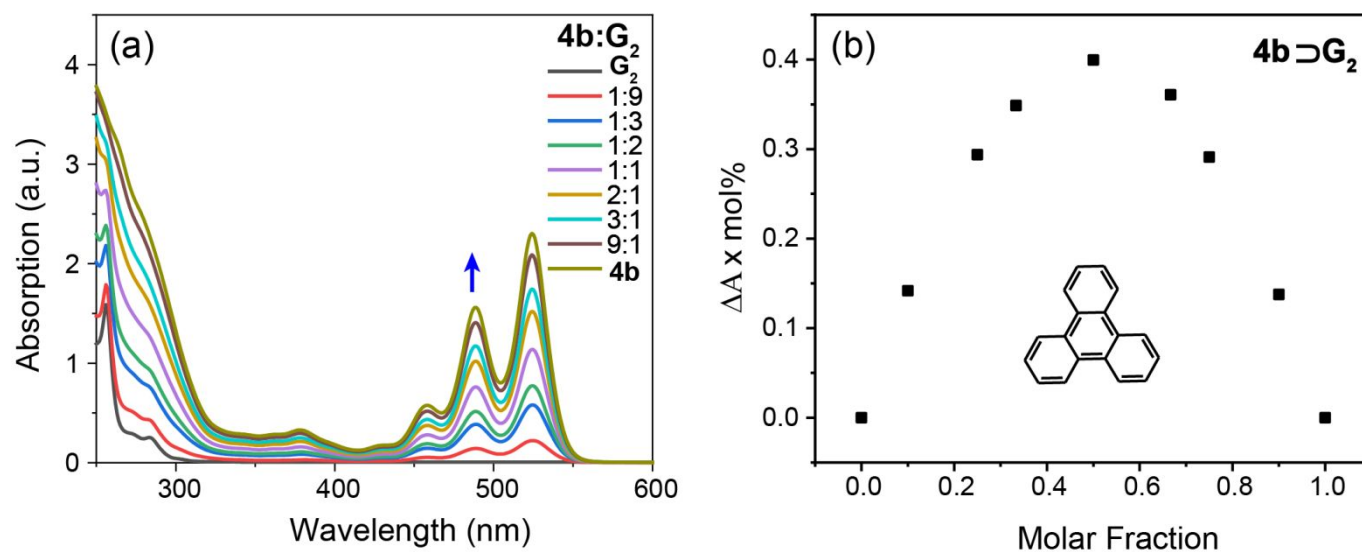

**Figure S41.** (a) UV-vis absorption of metallacage **4b** with guest **G**<sub>2</sub> in different molar ratios ( $[\mathbf{4b}] + [\mathbf{G}_2] = 10 \mu\text{M}$ ).

(b) Job's plot of the complex **4b** ⊃ **G**<sub>2</sub> in CH<sub>3</sub>CN, showing a 1:1 stoichiometry.

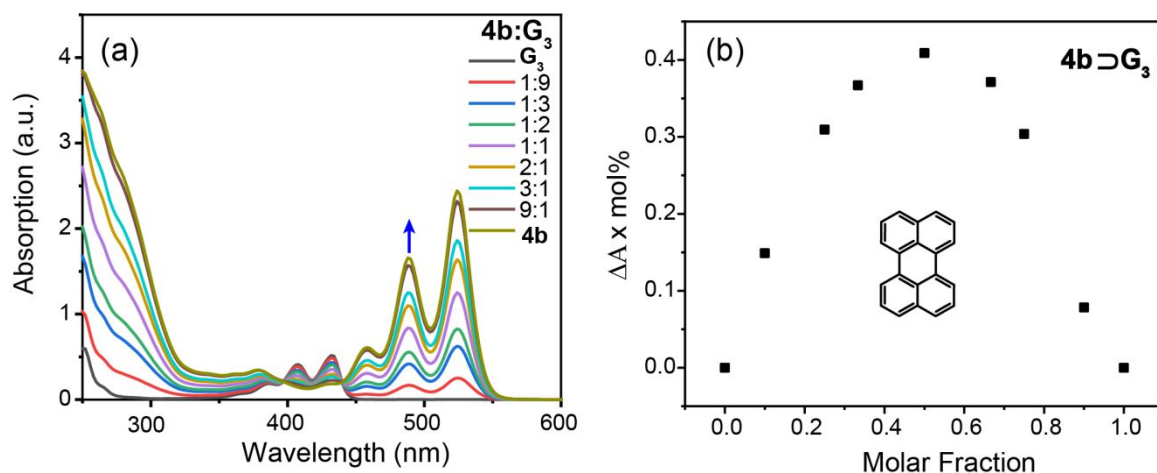

**Figure S42.** (a) UV-vis absorption of metallacage **4b** with guest **G<sub>3</sub>** in different molar ratios ( $[\mathbf{4b}] + [\mathbf{G}_3] = 10 \mu\text{M}$ ). (b) Job's plot of the complex **4b**:**G<sub>3</sub>** in  $\text{CH}_3\text{CN}$ , showing a 1:1 stoichiometry.

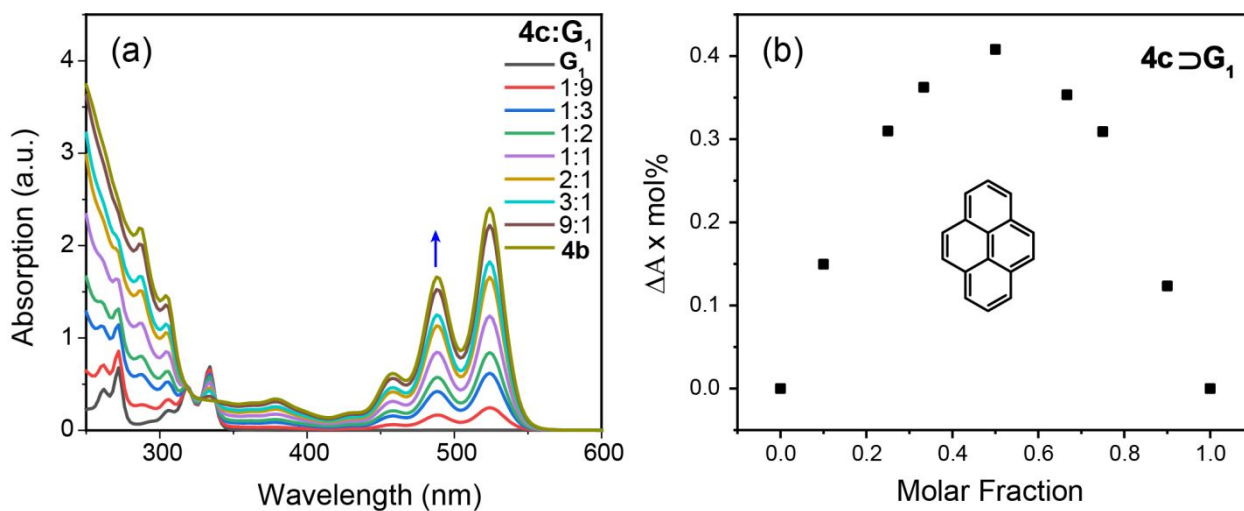

**Figure S43.** (a) UV-vis absorption of metallacage **4c** with guest **G<sub>1</sub>** in different molar ratios ( $[\mathbf{4c}] + [\mathbf{G}_1] = 10 \mu\text{M}$ ). (b) Job's plot of the complex **4c**:**G<sub>1</sub>** in  $\text{CH}_3\text{CN}$ , showing a 1:1 stoichiometry.

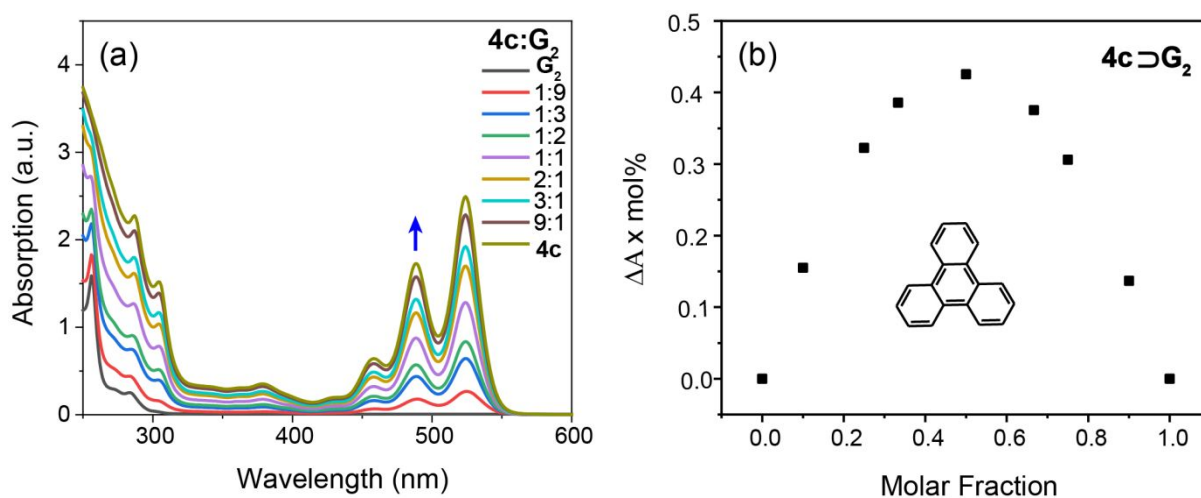

**Figure S44.** (a) UV-vis absorption of metallacage **4c** with guest **G<sub>2</sub>** in different molar ratios ( $[\mathbf{4c}] + [\mathbf{G}_2] = 10 \mu\text{M}$ ). (b) Job's plot of the complex **4c**:**G<sub>2</sub>** in  $\text{CH}_3\text{CN}$ , showing a 1:1 stoichiometry.

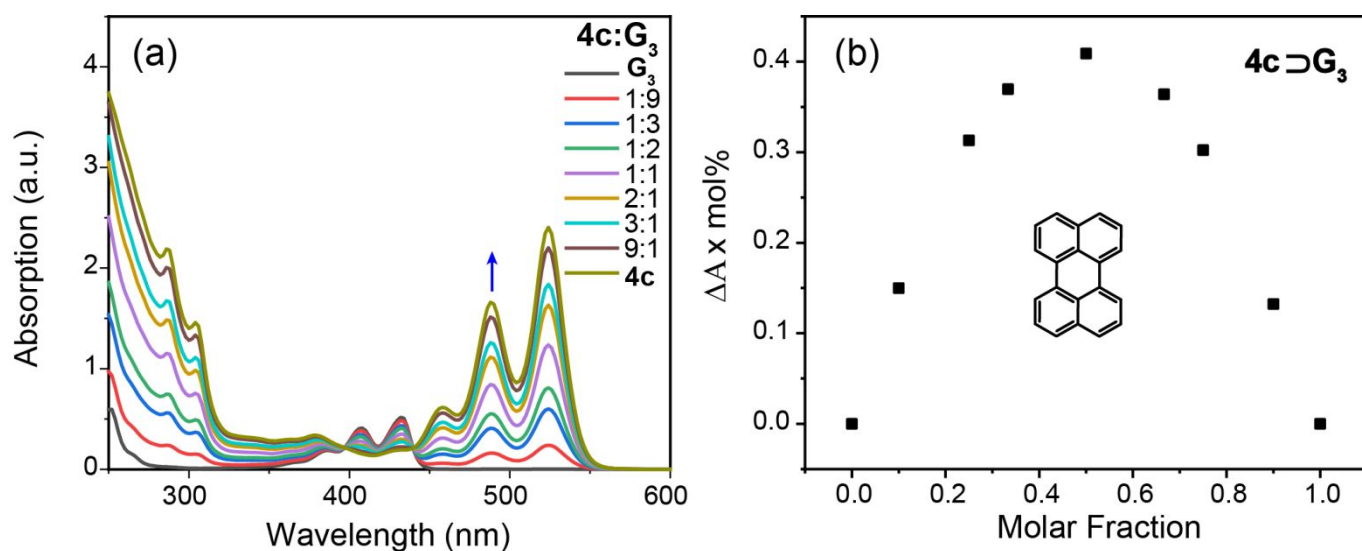

**Figure S45.** (a) UV-vis absorption of metallalage **4c** with guest **G<sub>3</sub>** in different molar ratios ( $[4c] + [G_3] = 10 \mu\text{M}$ ). (b) Job's plot of the complex **4c**⊃**G<sub>3</sub>** in  $\text{CH}_3\text{CN}$ , showing a 1:1 stoichiometry.

## 6.2 ESI-TOF-MS spectra of complexes

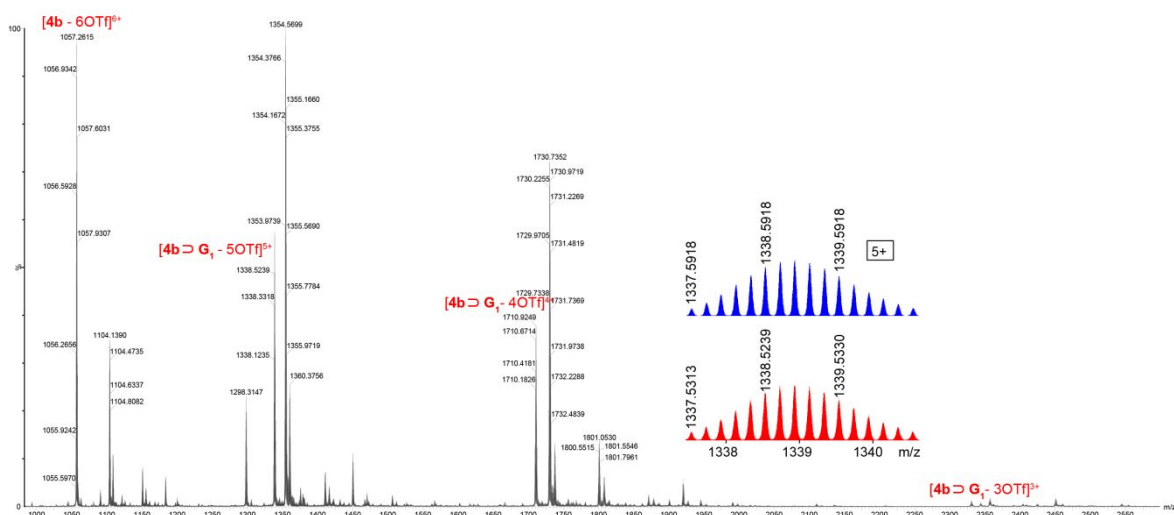

**Figure S46.** ESI-TOF-MS spectrum of complex **4b**⊃**G<sub>1</sub>**.

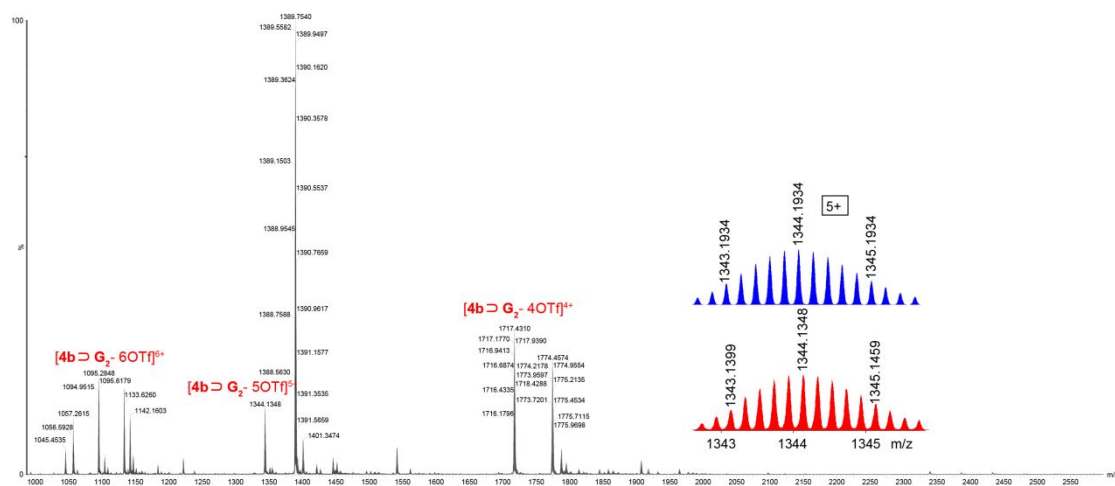

**Figure S47.** ESI-TOF-MS spectrum of complex **4b**⊃**G<sub>2</sub>**.



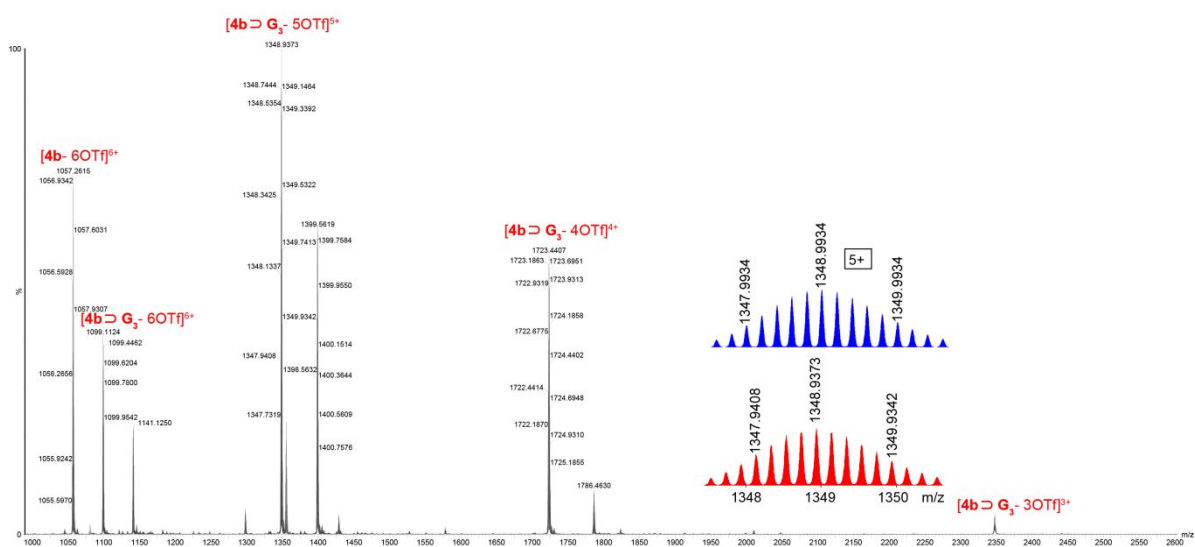

Figure S48. ESI-TOF-MS spectrum of complex  $4b \supset G_3$ .

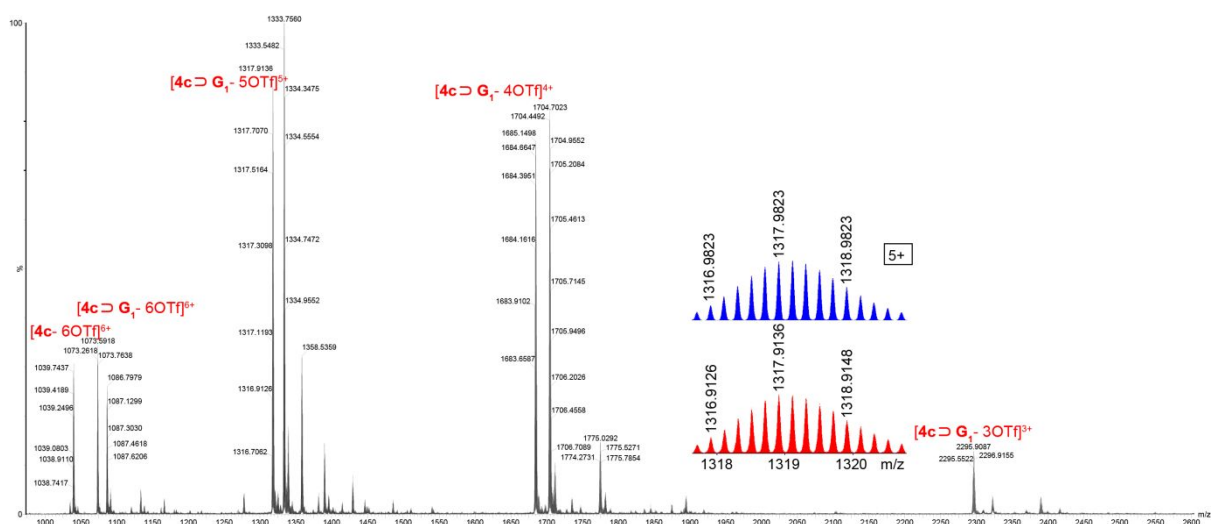

Figure S49. ESI-TOF-MS spectrum of complex  $4c \supset G_1$ .

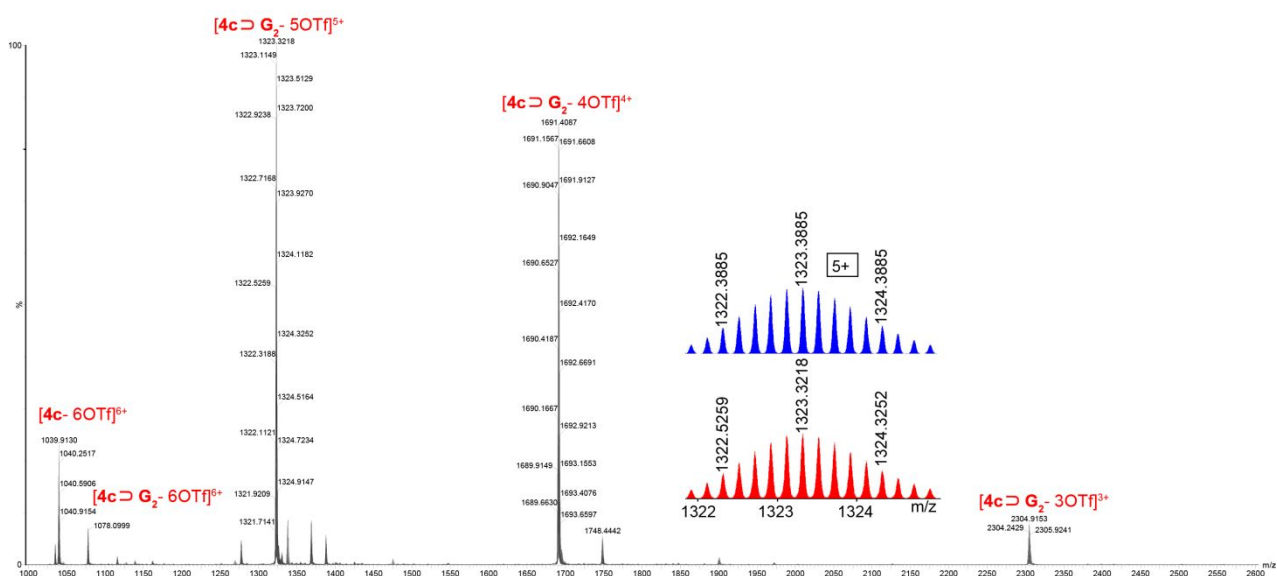

Figure S50. ESI-TOF-MS spectrum of complex  $4c \supset G_2$ .

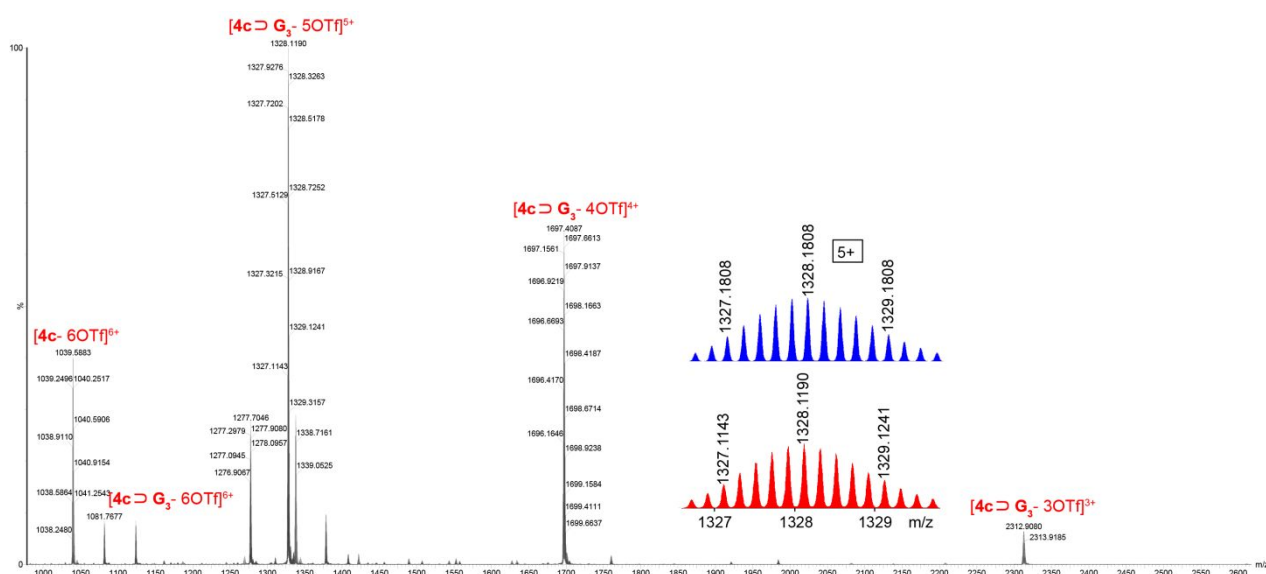

**Figure S51.** ESI-TOF-MS spectrum of complex **4c**⊃**G**<sub>3</sub>.

### 6.3 Determination of binding constant ( $K_a$ ) by $^1\text{H}$ NMR titration method

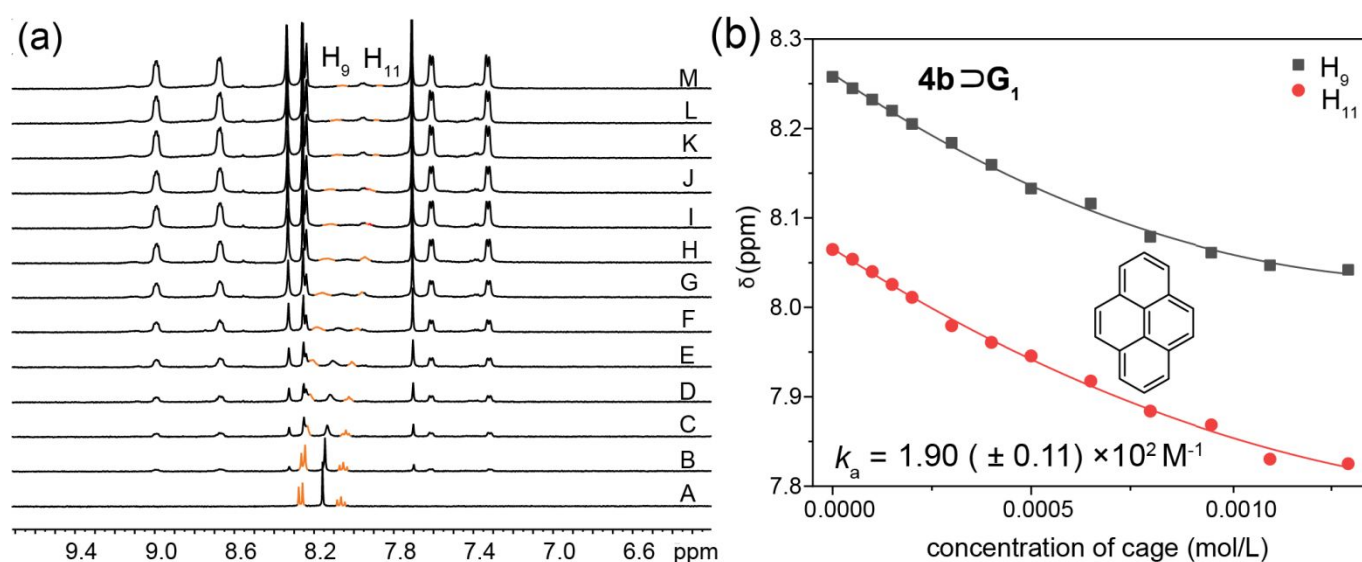

**Figure S52.**  $^1\text{H}$  NMR spectra (400 MHz,  $\text{CD}_3\text{CN}$ , 295 K) of **G**<sub>1</sub> at the fixed concentration of 0.5 mM upon the addition of metallacage **4b**: (A) 0 mM, (B) 0.05 mM, (C) 0.10 mM, (D) 0.15 mM, (E) 0.20 mM, (F) 0.30 mM, (G) 0.40 mM, (H) 0.50 mM, (I) 0.65 mM, (J) 0.8 mM, (K) 0.95 mM, (L) 1.10 mM, (M) 1.30 mM.

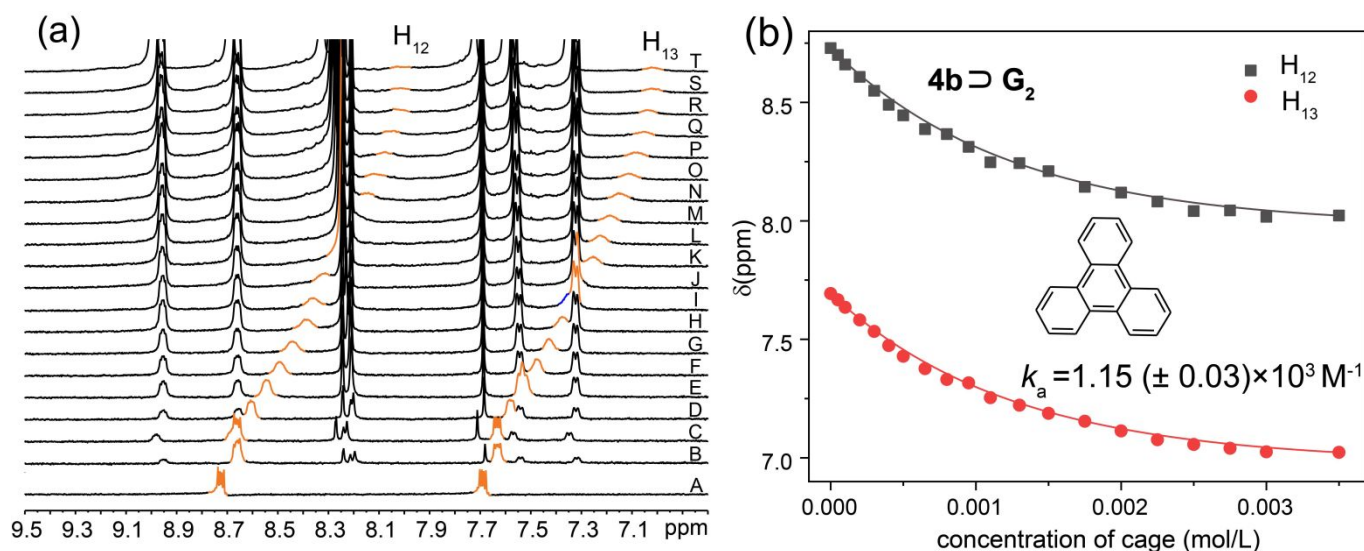

**Figure S53.** <sup>1</sup>H NMR spectra (400 MHz, CD<sub>3</sub>CN, 295 K) of G<sub>2</sub> at the fixed concentration of 0.5 mM upon the addition of metallacage 4b: (A) 0 mM, (B) 0.05 mM, (C) 0.10 mM, (D) 0.15 mM, (E) 0.20 mM, (F) 0.30 mM, (G) 0.40 mM, (H) 0.50 mM, (I) 0.65 mM, (J) 0.8 mM, (K) 1.10 mM, (L) 1.30 mM, (M) 1.50 mM, (N) 1.75 mM, (O) 2.00 mM, (P) 2.25 mM, (Q) 2.50 mM, (R) 2.75 mM, (S) 3.00 mM, (T) 3.50 mM.

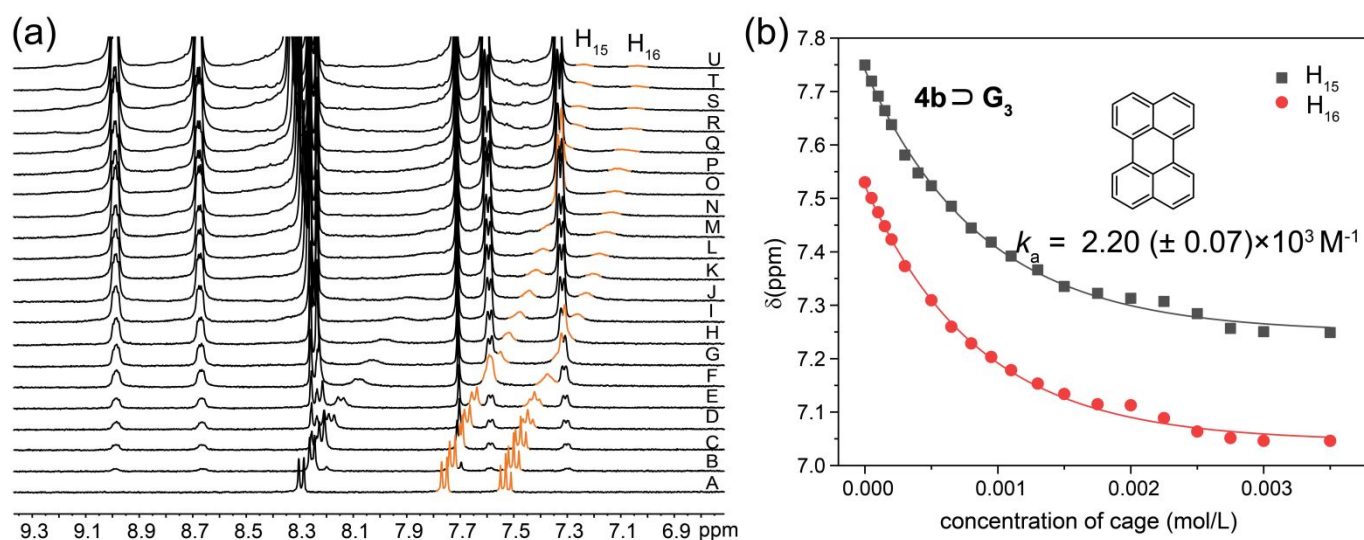

**Figure S54.** <sup>1</sup>H NMR spectra (400 MHz, CD<sub>3</sub>CN, 295 K) of G<sub>3</sub> at the fixed concentration of 0.5 mM upon the addition of metallacage 4b: (A) 0 mM, (B) 0.05 mM, (C) 0.10 mM, (D) 0.15 mM, (E) 0.20 mM, (F) 0.30 mM, (G) 0.40 mM, (H) 0.50 mM, (I) 0.65 mM, (J) 0.8 mM, (K) 0.95 mM, (L) 1.10 mM, (M) 1.30 mM, (N) 1.50 mM, (O) 1.75 mM, (P) 2.00 mM, (Q) 2.25 mM, (R) 2.50 mM, (S) 2.75 mM, (T) 3.00 mM, (U) 3.50 mM.

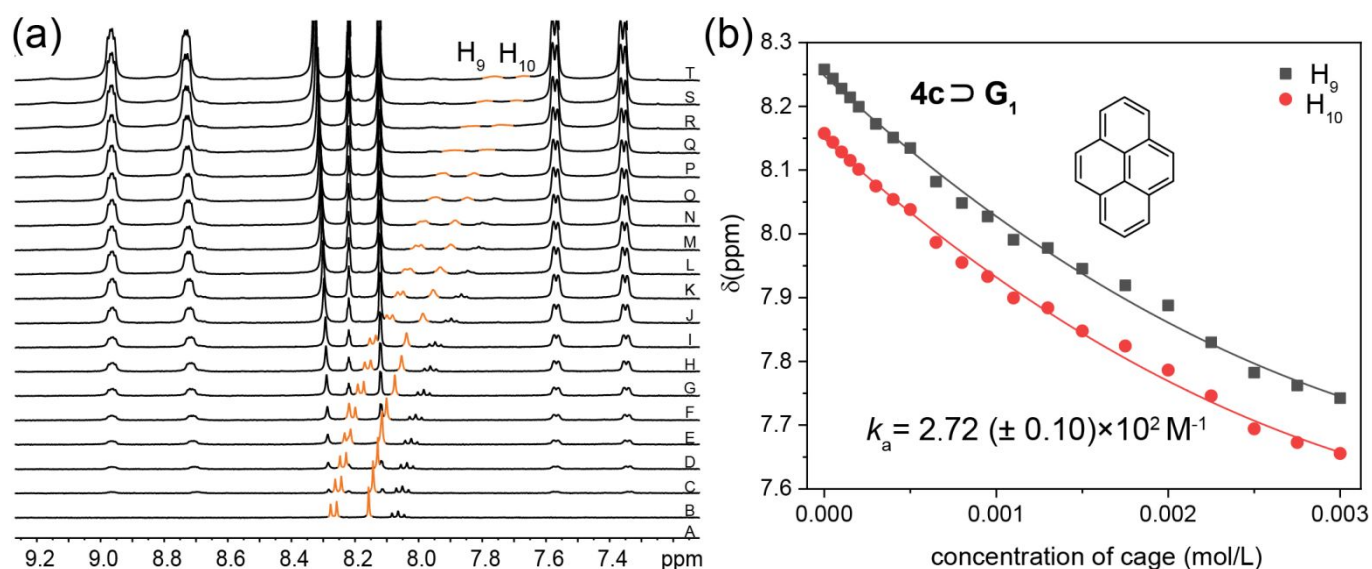

**Figure S55.**  $^1\text{H}$  NMR spectra (400 MHz,  $\text{CD}_3\text{CN}$ , 295 K) of  $\text{G}_1$  at the fixed concentration of 0.5 mM upon the addition of metallacage **4c**: (A) 0 mM, (B) 0.05 mM, (C) 0.10 mM, (D) 0.15 mM, (E) 0.20 mM, (F) 0.30 mM, (G) 0.40 mM, (H) 0.50 mM, (I) 0.65 mM, (J) 0.8 mM, (K) 0.95 mM, (L) 1.10 mM, (M) 1.30 mM, (N) 1.50 mM, (O) 1.75 mM, (P) 2.00 mM, (Q) 2.25 mM, (R) 2.50 mM, (S) 2.75 mM, (T) 3.00 mM.

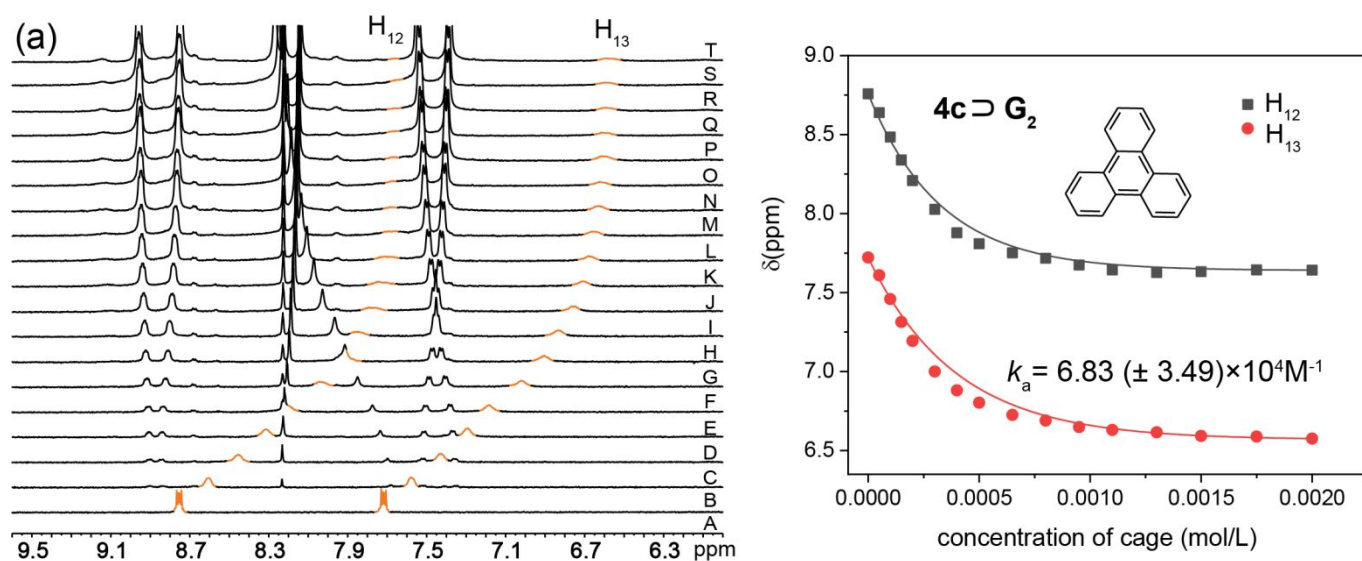

**Figure S56.**  $^1\text{H}$  NMR spectra (400 MHz,  $\text{CD}_3\text{CN}$ , 295 K) of  $\text{G}_2$  at the fixed concentration of 0.5 mM upon the addition of metallacage **4c**: (A) 0 mM, (B) 0.05 mM, (C) 0.10 mM, (D) 0.15 mM, (E) 0.20 mM, (F) 0.30 mM, (G) 0.40 mM, (H) 0.50 mM, (I) 0.65 mM, (J) 0.8 mM, (K) 0.95 mM, (L) 1.10 mM, (M) 1.30 mM, (N) 1.50 mM, (O) 1.75 mM, (P) 2.00 mM, (Q) 2.25 mM, (R) 2.50 mM, (S) 2.75 mM, (T) 3.00 mM.



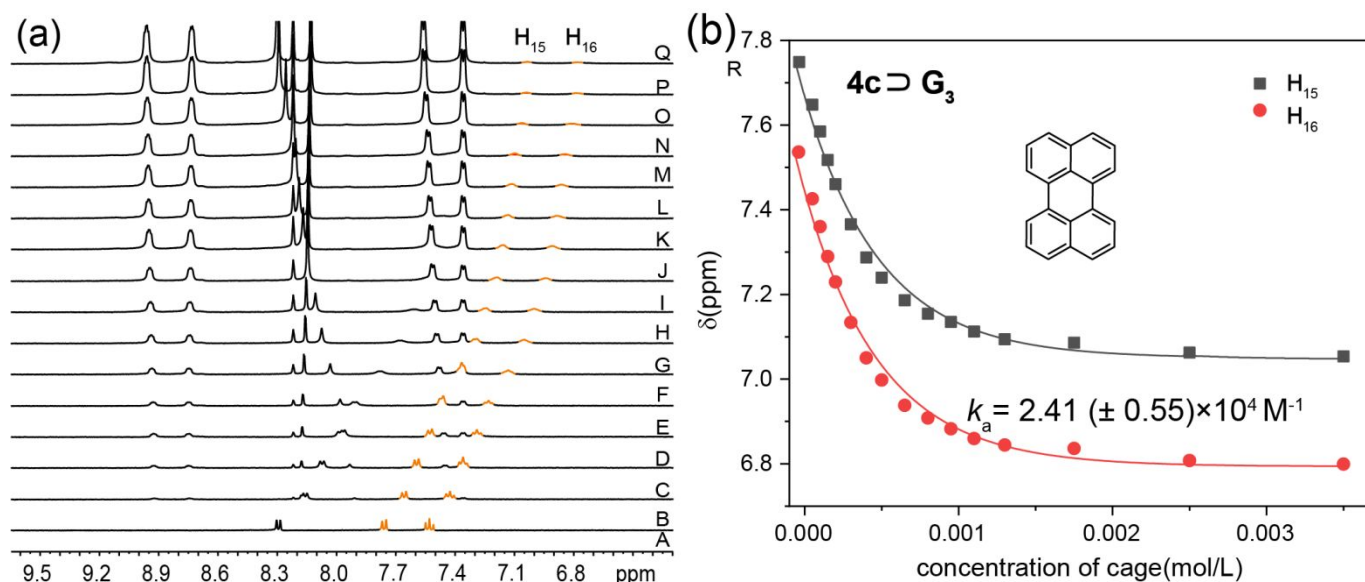

**Figure S57.** <sup>1</sup>H NMR spectra (400 MHz, CD<sub>3</sub>CN, 295 K) of G<sub>3</sub> at the fixed concentration of 0.5 mM upon the addition of metallalage 4c: (A) 0 mM, (B) 0.05 mM, (C) 0.10 mM, (D) 0.15 mM, (E) 0.20 mM, (F) 0.30 mM, (G) 0.40 mM, (H) 0.50 mM, (I) 0.65 mM, (J) 0.8 mM, (K) 0.95 mM, (L) 1.10 mM, (M) 1.30 mM, (N) 1.50 mM, (O) 1.75 mM, (P) 2.25 mM, (Q) 3.50 mM.

#### 7. The fluorescence spectra and corresponding CIE coordinates of complex 4c ⊃ G<sub>3</sub>

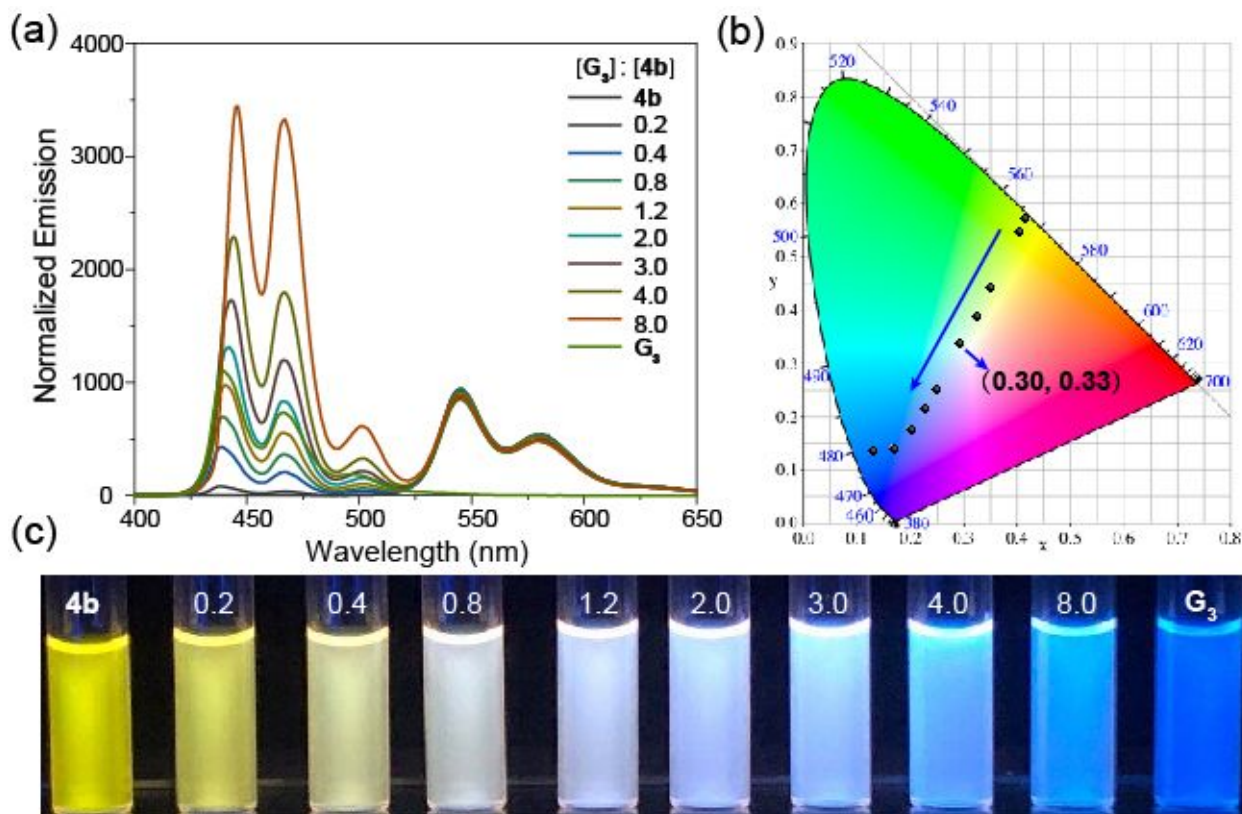

**Figure S58.** (a) Emission spectra of metallalage 4b with increasing amount of G<sub>3</sub>, (b) their corresponding 1931 CIE chromaticity coordinates and (c) fluorescence photographs in CH<sub>3</sub>CN. ([4b] = 10 μM, λ<sub>ex</sub> = 365 nm, 295 K).

## References

- S1. Takuro Teraoka, S. H., and Hiroshi Shinokubo, Iridium-Catalyzed Direct Tetraborylation of Perylene Bisimides. *Org. Lett.* **2011**, *13*, 2532.
- S2. Zheng, Y.; Zhao, Z.; Wang, M.; Ghosh, K.; Pollock, J. B.; Cook, T. R.; Stang, P. J. A Facile Approach toward Multicomponent Supramolecular Structures: Selective Self-Assembly via Charge Separation. *J. Am. Chem. Soc.* **2010**, *132*, 16873.
- S3. <http://app.supramolecular.org/bindfit/>
